# Supplementary material
Source: publisher figshare collection journal article supplement (https://gsapubs.figshare.com/ndownloader/files/22537442)
Supplement: Supplementary file 1 [file 22537442]

## Sheet: All Data
SUPPLEMENTAL DATA FILE 3: PORTABLE OSL RAW DATA
Powick Hams	S1 (IRSL)		S1 (Net IRSL)				S2 (OSL)		S2 (Net OSL)
Depth (cm)	Avr Counts per Cycle	+/-	Total Counts	+/-	x10^4	+/-	Avr Counts per Cycle	+/-	Total Counts	+/-	x10^4	+/-	IRSL:OSL
5	297.1	17.6	17827	137	1.7827	0.0137	739	27.5	44338	213	4.4338	0.0213	0.40203
10	249.9	16.2	14994	126	1.4994	0.0126	653.2	25.9	39194	199	3.9194	0.0199	0.382578
15	260.6	16.6	15638	129	1.5638	0.0129	678.8	26.3	40729	204	4.0729	0.0204	0.383913
20	242.9	16.1	14574	125	1.4574	0.0125	684.5	26.4	41069	205	4.1069	0.0205	0.354858
25	292.9	17.5	17571	136	1.7571	0.0136	788.5	28.4	47309	201	4.7309	0.0201	0.371465
30	437.4	21.2	26245	165	2.6245	0.0165	998.1	31.8	59888	247	5.9888	0.0247	0.438233
35	314.5	18.2	18867	141	1.8867	0.0141	792.1	28.4	47526	220	4.7526	0.022	0.397046
40	563.5	24	33810	186	3.381	0.0186	1142.5	33.9	68548	264	6.8548	0.0264	0.493217
45	353	19.1	21178	149	2.1178	0.0149	844.8	29.3	50685	223	5.0685	0.0223	0.41785
50	193.8	14.5	11629	112	1.1629	0.0112	506.7	22.8	30404	177	3.0404	0.0177	0.382475
55	267.6	16.7	16056	126	1.6056	0.0126	607.8	24.9	36467	193	3.6467	0.0193	0.440276
60	179.6	13.9	10775	108	1.0775	0.0108	472.2	22	28333	171	2.8333	0.0171	0.380347
65	281.1	17.2	16866	134	1.6866	0.0134	629.6	25.4	37778	197	3.7778	0.0197	0.446474
70	221.8	15.4	13310	119	1.331	0.0119	549.2	23.8	32953	184	3.2953	0.0184	0.40386
75	378.9	19.8	22733	154	2.2733	0.0154	921.8	30.6	55308	237	5.5308	0.0237	0.411044
80	373.1	19.7	22388	153	2.2388	0.0153	848.3	29.4	50899	228	5.0899	0.0228	0.439821
85	85.8	10	5148	78	0.5148	0.0078	286.6	17.4	17194	135	1.7194	0.0135	0.299372
90	91.9	10.3	5514	80	0.5514	0.008	293.5	17.6	17608	135	1.7608	0.0135	0.313118
95	147.9	12.7	8872	99	0.8872	0.0099	377.9	19.8	22672	154	2.2672	0.0154	0.391373
100	141.2	12.5	8471	97	0.8471	0.0097	343.7	18.9	20620	147	2.062	0.0147	0.410823
105	107.8	11	6467	86	0.6467	0.0086	348.6	19.1	20918	148	2.0918	0.0148	0.309237
110	99.2	10.7	5950	83	0.595	0.0083	289.6	17.4	17377	135	1.7377	0.0135	0.342541
115	110.5	11.2	6631	87	0.6631	0.0087	277.4	17.1	16643	133	1.6643	0.0133	0.398342
120	79.6	9.7	4778	76	0.4778	0.0076	222.2	15.4	13332	120	1.3332	0.012	0.358236
125	69.6	9.2	4178	72	0.4178	0.0072	204.8	14.8	12288	114	1.2288	0.0114	0.339844
130	83.2	9.9	4994	62	0.4994	0.0062	219.3	15.3	13160	119	1.316	0.0119	0.379389
135	53.5	8.3	3210	65	0.321	0.0065	142	12.5	8517	97	0.8517	0.0097	0.376761
140	62.7	8.9	3764	69	0.3764	0.0069	146.2	12.6	8771	99	0.8771	0.0099	0.428865
145	61.5	8.8	3690	68	0.369	0.0068	130.6	12	7836	94	0.7836	0.0094	0.470904
150	51.8	8.2	3110	64	0.311	0.0064	117.9	11.5	7076	90	0.7076	0.009	0.439355
155	61.3	8.7	3679	68	0.3679	0.0068	160.9	13.2	9654	103	0.9654	0.0103	0.380982
160	79.2	9.7	4751	76	0.4751	0.0076	236.1	15.9	14167	123	1.4167	0.0123	0.335451
165	106.1	11	6385	86	0.6385	0.0086	253.8	16.4	15225	127	1.5225	0.0127	0.418046
170	108.9	11.1	6533	87	0.6533	0.0087	246.6	16.2	14796	125	1.4796	0.0125	0.441606
175	193.5	14.4	11607	111	1.1607	0.0111	431.4	21.1	25882.5	163	2.58825	0.0163	0.44854
180	236.2	15.8	14174	123	1.4174	0.0123	486	22.3	29161	174	2.9161	0.0174	0.486008
185	268.2	16.7	16090	131	1.609	0.0131	503.2	22.8	30193	177	3.0193	0.0177	0.532989
190	145.7	12.7	8742	93	0.8742	0.0093	307.6	18	18458	139	1.8458	0.0139	0.473667
195	292.1	17.5	17526	136	1.7526	0.0136	540.8	23.6	32447	183	3.2447	0.0183	0.540126
200	274.4	17	16462	132	1.6462	0.0132	509.6	22.9	30576	178	3.0576	0.0178	0.538462
205	176.7	13.9	10601	108	1.0601	0.0108	319.7	18.2	19180	142	1.918	0.0142	0.552706
210	169	13.5	10141.5	84	1.01415	0.0084	350.5	19.1	21029	148	2.1029	0.0148	0.482168
215	114.1	11.3	6843	88	0.6843	0.0088	330.6	18.6	19835	144	1.9835	0.0144	0.34513
220	93	10.3	5579	80	0.5579	0.008	275.8	17	16547	131	1.6547	0.0131	0.337201
225	71.9	9.3	4316	73	0.4316	0.0073	221	15.4	13259	118	1.3259	0.0118	0.325339
230	203.4	14.7	12201	115	1.2201	0.0115	233.1	15.8	13987	122	1.3987	0.0122	0.872587
235	64.7	8.9	3879	69	0.3879	0.0069	160.5	13.2	9628	103	0.9628	0.0103	0.403115
240	91.2	10.4	5474	80	0.5474	0.008	216.8	15.2	13008	118	1.3008	0.0118	0.420664
245	80.6	9.8	4834	76	0.4834	0.0076	152.4	12.9	9145	101	0.9145	0.0101	0.528871
250	91.1	10.2	5465	80	0.5465	0.008	182	14	10917	99	1.0917	0.0099	0.500549
255	126.6	11.9	7596	92	0.7596	0.0092	274.5	17	16469	132	1.6469	0.0132	0.461202
260	139.8	12.5	8390	97	0.839	0.0097	327.7	18.5	19660	144	1.966	0.0144	0.42661
265	187	14.3	11217	111	1.1217	0.0111	408.4	20.6	24504	160	2.4504	0.016	0.457884
270	207	15	12418	116	1.2418	0.0116	434.1	21.2	26043	165	2.6043	0.0165	0.476849
275	205.7	14.9	12342	116	1.2342	0.0116	452.9	21.7	27173	168	2.7173	0.0168	0.454184
280	205	14.8	12302.5	107	1.23025	0.0107	443.2	21.4	26593	166	2.6593	0.0166	0.462545
285	177.1	13.8	10625	108	1.0625	0.0108	366.2	19.6	21974	152	2.1974	0.0152	0.483616
290	195.3	14.6	11716	113	1.1716	0.0113	395	20.3	23701	157	2.3701	0.0157	0.49443
295	165.9	13.5	9951	105	0.9951	0.0105	347.6	19.1	20858	148	2.0858	0.0148	0.477273
300	210.9	15	12125	115	1.2125	0.0115	435.5	21.2	25079	162	2.5079	0.0162	0.484271
305	127.7	12	7662	93	0.7662	0.0093	299.2	17.8	17952	138	1.7952	0.0138	0.426805
310	251.2	16.2	15069	127	1.5069	0.0127	562.9	23.9	33776	186	3.3776	0.0186	0.44626
315	262.2	16.6	15731	129	1.5731	0.0129	587.1	24.5	35223	190	3.5223	0.019	0.446602
320	301.2	17.7	18074	138	1.8074	0.0138	600.3	24.8	36019	192	3.6019	0.0192	0.501749
325	217.7	15.3	13061	118	1.3061	0.0118	497.8	22.6	29868	176	2.9868	0.0176	0.437324
330	226.3	15.5	13577	121	1.3577	0.0121	489.5	22.4	29367	174	2.9367	0.0174	0.462308
335	189.5	14.3	11368	111	1.1368	0.0111	423.5	20.9	25407	135	2.5407	0.0135	0.447462
340	259.7	16.7	15583	129	1.5583	0.0129	572	24.1	34317	188	3.4317	0.0188	0.454021
345	219.8	15.3	13185	118	1.3185	0.0118	499.3	22.6	29958.5	171	2.99585	0.0171	0.440216
350	214.6	15.1	12874.5	114	1.28745	0.0114	485.8	22.4	29147	174	2.9147	0.0174	0.441746
355	213.1	15.1	12787	117	1.2787	0.0117	478.8	22.2	28728.5	169	2.87285	0.0169	0.445071
360	210.4	15	12623	117	1.2623	0.0117	448.9	21.5	26832	167	2.6832	0.0167	0.468701
365	227.5	15.6	13649	121	1.3649	0.0121	529.2	23.3	31754	181	3.1754	0.0181	0.429894
370	223.7	15.5	13419	120	1.3419	0.012	518.9	23.1	31131	179	3.1131	0.0179	0.431104
375	208.8	14.9	12529	116	1.2529	0.0116	469.9	21.9	28195	171	2.8195	0.0171	0.44435
380	197.3	14.5	11839	113	1.1839	0.0113	432.1	21.1	25924	164	2.5924	0.0164	0.456607
385	158.1	13.2	9485	102	0.9485	0.0102	390	20.1	23400	156	2.34	0.0156	0.405385
390	151.5	12.9	9088	100	0.9088	0.01	336.8	18.7	20207	144	2.0207	0.0144	0.449822
395	160.4	13.3	9625	103	0.9625	0.0103	407	20.6	23433	156	2.3433	0.0156	0.394103
400	143.4	12.6	8601	98	0.8601	0.0098	336.8	18.8	20207	145	2.0207	0.0145	0.425772
405	122.8	11.7	7370	91	0.737	0.0091	367.7	19.5	22061	152	2.2061	0.0152	0.333968
410	150.8	12.8	9050	100	0.905	0.01	373.3	19.7	22399	153	2.2399	0.0153	0.403965
415	139.6	12.4	8376	96	0.8376	0.0096	337.5	18.8	20248	146	2.0248	0.0146	0.41363
420	181.4	14	10885	109	1.0885	0.0109	436.1	21.2	26168	165	2.6168	0.0165	0.41596
425	195.4	14.5	11722	113	1.1722	0.0113	521.2	23.1	31269	180	3.1269	0.018	0.374904
430	164.7	13.4	9879	104	0.9879	0.0104	388	20.1	23282	156	2.3282	0.0156	0.424485
435	146.7	12.8	8800	99	0.88	0.0099	334.9	18.7	20092	145	2.0092	0.0145	0.438041
440	115.7	11.4	6844	89	0.6844	0.0089	276.4	17	16585	132	1.6585	0.0132	0.418596
445	106	11.1	6361	86	0.6361	0.0086	277.1	17.1	16625	124	1.6625	0.0124	0.382533
450	104.4	10.9	6264	85	0.6264	0.0085	245.2	16.1	14710	125	1.471	0.0125	0.425775
455	95.7	10.5	5741	82	0.5741	0.0082	221	15.3	13257	119	1.3257	0.0119	0.433032
460	133.5	12.1	8009	95	0.8009	0.0095	283.8	17.2	17025	134	1.7025	0.0134	0.470402
465	138.6	12.4	8317	96	0.8317	0.0096	342.7	18.9	20562	147	2.0562	0.0147	0.404435
470	205.9	14.9	12354.5	111	1.23545	0.0111	413.2	20.7	24793	160	2.4793	0.016	0.498306
475	253.4	16.4	15205	127	1.5205	0.0127	607.3	25	36438	193	3.6438	0.0193	0.417257
480	257.9	16.5	15472	128	1.5472	0.0128	557.5	23.9	33447	185	3.3447	0.0185	0.462601
485	235.4	15.8	14126	123	1.4126	0.0123	472.8	22	28370	171	2.837	0.0171	0.497885
490	362.9	19.4	21772	171	2.1772	0.0171	654.7	25.8	39281	201	3.9281	0.0201	0.5543
495	214.8	14.1	12885	118	1.2885	0.0118	392.7	20.1	23562	157	2.3562	0.0157	0.546982
500	195	14.4	11701	113	1.1701	0.0113	359.1	19.3	21548	150	2.1548	0.015	0.543024
505	257.7	16.4	15463	128	1.5463	0.0128	457.3	21.7	27436	169	2.7436	0.0169	0.563525
510	244.7	16.1	14679	125	1.4679	0.0125	443.9	21.4	26631	166	2.6631	0.0166	0.55125
515	236.1	15.8	14166	122	1.4166	0.0122	388.1	20.5	23285	156	2.3285	0.0156	0.608348
520	305.5	17.9	18329	139	1.8329	0.0139	517.4	23.1	31041	179	3.1041	0.0179	0.590452
525	280	17.2	16798	133	1.6798	0.0133	454	21.6	27239	165	2.7239	0.0165	0.61674
530	473.8	22.1	28428	171	2.8428	0.0171	810	28.7	48602	223	4.8602	0.0223	0.584938
535	771.2	28	46269	217	4.6269	0.0217	1356.4	37	81383	287	8.1383	0.0287	0.568564

## Sheet: Replicates
Powick Hams	S1 (IRSL)		S1 (Net IRSL)				S2 (OSL)		S2 (Net OSL)
Depth (cm)	Avr Counts per Cycle (Rep)	+/-	Total Counts (Rep)	+/-	x10^4	+/-	Avr Counts per Cycle (Rep)	+/-	Total Counts (Rep)	+/-	x10^4	+/-	IRSL:OSL (Rep)
5
10
15
20	300.2	17.5	18012	136	1.8012	0.0136	840.5	29	50431	224	5.0431	0.0224	0.357168
25	366.1	19.3	21967	150	2.1967	0.015	938	30.7	56279	238	5.6279	0.0238	0.390299
30	338.1	18.6	20284	145	2.0284	0.0145	920.7	30.4	55242	232	5.5242	0.0232	0.367221
35	452.4	21.4	27144	160	2.7144	0.016	1286.8	35.9	77210	279	7.721	0.0279	0.35157
40	558.4	23.8	33505	185	3.3505	0.0185	1281	35.9	76862	278	7.6862	0.0278	0.435909
45	441.6	21.1	26498	165	2.6498	0.0165	1142.2	33.8	68534	263	6.8534	0.0263	0.386622
50	272.7	16.8	16359	130	1.6359	0.013	669.6	26.1	40173	202	4.0173	0.0202	0.407258
55	231	15.5	13859	120	1.3859	0.012	677.1	26.2	40625	203	4.0625	0.0203	0.341161
60	174.4	13.5	10465	105	1.0465	0.0105	506.8	22.6	30410	176	3.041	0.0176	0.34412
65	258.6	16.4	15516	123	1.5516	0.0123	610.3	24.9	36615	182	3.6615	0.0182	0.423726
70	270.9	16.7	16256	130	1.6256	0.013	692.2	26.5	41531	205	4.1531	0.0205	0.391361
75	452.8	21.5	27165	167	2.7165	0.0167	1025.1	32.1	61503	249	6.1503	0.0249	0.441713
80	303.1	17.7	18183	136	1.8183	0.0136	782.4	28	46945	218	4.6945	0.0218	0.387398
85	116	11.2	6961	87	0.6961	0.0087	371.5	19.5	22287	151	2.2287	0.0151	0.312248
90	122.3	11.5	7340	89	0.734	0.0089	349.5	18.9	20971	147	2.0971	0.0147	0.349928
95	128.5	11.7	7711	91	0.7711	0.0091	363.7	19.3	21820	150	2.182	0.015	0.353313
100	119.4	11.3	7161	87	0.7161	0.0087	333.5	18.5	20009	144	2.0009	0.0144	0.358021
105	105.9	10.7	6351	83	0.6351	0.0083	367.7	19.4	22061	151	2.2061	0.0151	0.288007
110	116.1	11.2	6963	81	0.6963	0.0081	303.4	17.7	18201	137	1.8201	0.0137	0.382663
115	107.3	10.8	6440	81	0.644	0.0081	257	16.2	15417	127	1.5417	0.0127	0.41751
120	97.9	10.3	5874	80	0.5874	0.008	254	16.2	15238	126	1.5238	0.0126	0.385433
125
130
135
140
145
150
155
160	89.1	9.9	5344	77	0.5344	0.0077	194.4	14.3	11664	111	1.1664	0.0111	0.458333
165	101	10.5	6062	82	0.6062	0.0082	215.7	15	12941	116	1.2941	0.0116	0.468243
170	105.4	10.7	6323	83	0.6323	0.0083	223.9	15.2	13434	118	1.3434	0.0118	0.470746
175	202.4	14.6	12142	113	1.2142	0.0113	395.3	20.1	23720	156	2.372	0.0156	0.512016
180	249.2	16	14949	125	1.4949	0.0125	488.5	22.3	29390	173	2.939	0.0173	0.510133
185	304.4	17.5	18265	130	1.8265	0.013	520.2	23	31214	178	3.1214	0.0178	0.58516
190	173	13.5	10379	103	1.0379	0.0103	319.3	18.1	19155	141	1.9155	0.0141	0.54181
195	257.2	16.3	15432	127	1.5432	0.0127	444.5	21.3	26670	138	2.667	0.0138	0.578628
200	271.8	16.7	16308	127	1.6308	0.0127	480.8	22.2	28850	161	2.885	0.0161	0.565308
205	161.4	13.1	9684	101	0.9684	0.0101	300.4	17.6	18025	136	1.8025	0.0136	0.537284
210	186.4	14	11182	109	1.1182	0.0109	375.4	19.7	22522	152	2.2522	0.0152	0.496537
215	98.6	10.3	5917	81	0.5917	0.0081	276.7	16.9	16599	131	1.6599	0.0131	0.356343
220	93	10.3	5579	80	0.5579	0.008	275.8	17	16547	131	1.6547	0.0131	0.337201
225	111.2	11	6674	85	0.6674	0.0085	292.3	17.4	17538	135	1.7538	0.0135	0.380431
230	67.5	8.8	4052	68	0.4052	0.0068	191.9	14.1	11516	110	1.1516	0.011	0.351746
235	70.3	8.9	4216	69	0.4216	0.0069	173.9	13.5	10434	105	1.0434	0.0105	0.404255
240	87.2	9.8	5229	76	0.5229	0.0076	216.7	15	13004	117	1.3004	0.0117	0.4024
245	106.4	10.7	6384	84	0.6384	0.0084	171.3	13.4	10277	104	1.0277	0.0104	0.621133
250	95.2	10.2	5709	79	0.5709	0.0079	173.1	13.5	10388	105	1.0388	0.0105	0.549971
255
260
265
270
275
280
285
290
295
300	164.1	13.1	9843	102	0.9843	0.0102	355.9	19.1	21351	148	2.1351	0.0148	0.461085
305	176.3	13.6	10578	105	1.0578	0.0105	408	20.4	24478	158	2.4478	0.0158	0.432108
310	176.1	13.6	10566	106	1.0566	0.0106	418.1	20.7	25088	158	2.5088	0.0158	0.421191
315	192.5	14.2	11574	110	1.1574	0.011	461.1	21.7	27663	168	2.7663	0.0168	0.41748
320	234.7	15.6	14082	121	1.4082	0.0121	529.5	23.2	31770	180	3.177	0.018	0.443248
325	217	15	13021	117	1.3021	0.0117	506	22.7	30362	176	3.0362	0.0176	0.428854
330	186.8	14	11205	106	1.1205	0.0106	430.9	20.9	25854	156	2.5854	0.0156	0.433511
335	176.2	13.7	10571	106	1.0571	0.0106	396.1	20	23764	156	2.3764	0.0156	0.444837
340	231.4	15.5	13882	120	1.3882	0.012	459	21.6	27541	168	2.7541	0.0168	0.504139
345	201.7	14.4	12103	113	1.2103	0.0113	436.2	21.1	26174	164	2.6174	0.0164	0.462403
350	193.1	14.2	11588	110	1.1588	0.011	455.2	21.6	27309	167	2.7309	0.0167	0.424209
355
360
365
370
375
380
385
390
395
400
405
410
415
420
425
430
435
440
445
450	99	10.4	5940	80	0.594	0.008	257.4	16.3	15446	127	1.5446	0.0127	0.384615
455	85.4	9.7	5123	76	0.5123	0.0076	200.7	14.4	12042	112	1.2042	0.0112	0.425511
460	120	11.3	7200	88	0.72	0.0088	252	16.1	15120	125	1.512	0.0125	0.47619
465	165.5	13.2	9927	102	0.9927	0.0102	357.3	19.1	21437	148	2.1437	0.0148	0.463196
470	193.5	14.2	11610	109	1.161	0.0109	434.2	21.1	26053	163	2.6053	0.0163	0.445647
475	189	14	11342	109	1.1342	0.0109	473.8	22	28430	170	2.843	0.017	0.398902
480	258	16.4	15482	127	1.5482	0.0127	484.7	22.3	29080	172	2.908	0.0172	0.532288
485	241.4	15.9	14482	123	1.4482	0.0123	439.5	21.2	26372	164	2.6372	0.0164	0.549261
490	281.1	17	16868	128	1.6868	0.0128	562.4	23.8	33743	184	3.3743	0.0184	0.499822
495	200.2	14.4	12013	112	1.2013	0.0112	408.7	20.4	24520	158	2.452	0.0158	0.489846
500	220.1	15.1	13204	117	1.3204	0.0117	411.7	20.4	24700	159	2.47	0.0159	0.534613
505
510
515
520
525
530
535

## Sheet: Sand & Gravel
=========================================================================================
Run	Name:	Powick	Hams	Sample	no:	56
Sequence	Name:	Soton	Test	Filename:	Soton	Test
Dark	Count:	16	c/s	Light	Count:	0	c/s
Dark	Count	Correction:	OFF	256	Offset	Subtract:	ON
Datafile	Path:	C:\Results\Soton	Test\Powick	Hams\Powick	Hams\Powick	Hams0056.psl
Summary	Path	:	C:\Results\Soton	Test\Powick	Hams\Powick	Hams\summary\Powick	Hams.sum
Run	Sequence	:	Soton	Test
-----------------------------------------------------------------------------------------
\	Sand	&	Gravel	@	2019-03-07	10:07:19	/
	'-----------------------------------'
----------------------------------------------------------------------------------------
Measurement	:	DARK	60s	|	Stim	0	|	On/Off(us)	15,15	|	Cycle(ms),No	1000,	60
----------------------------------------------------------------------------------------
Time	(s)	Total	Count	Counts	per	Cycle
--------	---------------------	---------------------
	1	-7	+/-	5	-7	+/-	5
	2	-3	+/-	6	4	+/-	4
	3	-1	+/-	7	2	+/-	4
	4	1	+/-	8	2	+/-	4
	5	-3	+/-	9	-4	+/-	4
	6	0	+/-	10	3	+/-	4
	7	2	+/-	11	2	+/-	4
	8	2	+/-	11	0	+/-	4
	9	9	+/-	12	7	+/-	5
	10	-6	+/-	13	-15	+/-	6
	11	-7	+/-	14	-1	+/-	4
	12	-18	+/-	14	-11	+/-	5
	13	-10	+/-	15	8	+/-	5
	14	-1	+/-	15	9	+/-	5
	15	-12	+/-	16	-11	+/-	5
	16	-8	+/-	16	4	+/-	4
	17	-7	+/-	17	1	+/-	4
	18	-3	+/-	17	4	+/-	4
	19	5	+/-	18	8	+/-	5
	20	1	+/-	18	-4	+/-	4
	21	3	+/-	18	2	+/-	4
	22	0	+/-	19	-3	+/-	4
	23	0	+/-	19	0	+/-	4
	24	-1	+/-	20	-1	+/-	4
	25	-1	+/-	20	0	+/-	4
	26	2	+/-	20	3	+/-	4
	27	3	+/-	21	1	+/-	4
	28	1	+/-	21	-2	+/-	4
	29	6	+/-	22	5	+/-	5
	30	5	+/-	22	-1	+/-	4
	31	11	+/-	23	6	+/-	5
	32	19	+/-	23	8	+/-	5
	33	25	+/-	24	6	+/-	5
	34	24	+/-	24	-1	+/-	4
	35	33	+/-	24	9	+/-	5
	36	33	+/-	25	0	+/-	4
	37	34	+/-	25	1	+/-	4
	38	28	+/-	25	-6	+/-	5
	39	29	+/-	26	1	+/-	4
	40	26	+/-	26	-3	+/-	4
	41	16	+/-	26	-10	+/-	5
	42	14	+/-	26	-2	+/-	4
	43	20	+/-	27	6	+/-	5
	44	13	+/-	27	-7	+/-	5
	45	16	+/-	27	3	+/-	4
	46	20	+/-	27	4	+/-	4
	47	32	+/-	28	12	+/-	5
	48	25	+/-	28	-7	+/-	5
	49	16	+/-	28	-9	+/-	5
	50	22	+/-	29	6	+/-	5
	51	16	+/-	29	-6	+/-	5
	52	15	+/-	29	-1	+/-	4
	53	7	+/-	29	-8	+/-	5
	54	3	+/-	29	-4	+/-	4
	55	-3	+/-	30	-6	+/-	5
	56	-18	+/-	30	-15	+/-	6
	57	-9	+/-	30	9	+/-	5
	58	5	+/-	31	14	+/-	5
	59	2	+/-	31	-3	+/-	4
	60	8	+/-	31	6	+/-	5
	Terminal	Count	=	8	+/-	31
----------------------------------------------------------------------------------------
Measurement	:	S1	15	15	60s	|	Stim	1	|	On/Off(us)	15,15	|	Cycle(ms),No	1000,	60
----------------------------------------------------------------------------------------
Time	(s)	Total	Count	Counts	per	Cycle
--------	---------------------	---------------------
	1	992	+/-	32	992	+/-	32
	2	1953	+/-	45	961	+/-	31
	3	2948	+/-	55	995	+/-	32
	4	3953	+/-	63	1005	+/-	32
	5	4829	+/-	70	876	+/-	30
	6	5781	+/-	77	952	+/-	31
	7	6669	+/-	82	888	+/-	30
	8	7577	+/-	88	908	+/-	30
	9	8446	+/-	93	869	+/-	30
	10	9370	+/-	98	924	+/-	31
	11	10190	+/-	102	820	+/-	29
	12	11026	+/-	106	836	+/-	29
	13	11934	+/-	110	908	+/-	30
	14	12788	+/-	114	854	+/-	29
	15	13688	+/-	118	900	+/-	30
	16	14514	+/-	122	826	+/-	29
	17	15319	+/-	125	805	+/-	29
	18	16159	+/-	128	840	+/-	29
	19	16959	+/-	131	800	+/-	29
	20	17745	+/-	134	786	+/-	28
	21	18566	+/-	137	821	+/-	29
	22	19366	+/-	140	800	+/-	29
	23	20145	+/-	143	779	+/-	28
	24	20945	+/-	146	800	+/-	29
	25	21632	+/-	148	687	+/-	27
	26	22413	+/-	151	781	+/-	28
	27	23198	+/-	154	785	+/-	28
	28	23937	+/-	156	739	+/-	27
	29	24641	+/-	158	704	+/-	27
	30	25497	+/-	161	856	+/-	30
	31	26198	+/-	163	701	+/-	27
	32	26906	+/-	166	708	+/-	27
	33	27630	+/-	168	724	+/-	27
	34	28355	+/-	170	725	+/-	27
	35	29069	+/-	172	714	+/-	27
	36	29879	+/-	175	810	+/-	29
	37	30554	+/-	176	675	+/-	26
	38	31271	+/-	179	717	+/-	27
	39	32050	+/-	181	779	+/-	28
	40	32740	+/-	183	690	+/-	27
	41	33462	+/-	185	722	+/-	27
	42	34245	+/-	187	783	+/-	28
	43	34917	+/-	189	672	+/-	26
	44	35628	+/-	191	711	+/-	27
	45	36284	+/-	192	656	+/-	26
	46	36990	+/-	194	706	+/-	27
	47	37576	+/-	196	586	+/-	25
	48	38268	+/-	198	692	+/-	27
	49	38912	+/-	199	644	+/-	26
	50	39636	+/-	201	724	+/-	27
	51	40276	+/-	203	640	+/-	26
	52	41003	+/-	205	727	+/-	27
	53	41631	+/-	206	628	+/-	25
	54	42327	+/-	208	696	+/-	27
	55	43039	+/-	210	712	+/-	27
	56	43621	+/-	211	582	+/-	24
	57	44283	+/-	213	662	+/-	26
	58	44980	+/-	214	697	+/-	27
	59	45643	+/-	216	663	+/-	26
	60	46269	+/-	217	626	+/-	25
		S1	AVR Counts per Cycle		771.15	+/-	28
	Terminal	Count	=	46269	+/-	217
----------------------------------------------------------------------------------------
Measurement	:	S2	15	15	60s	|	Stim	2	|	On/Off(us)	15,15	|	Cycle(ms),No	1000,	60
----------------------------------------------------------------------------------------
Time	(s)	Total	Count	Counts	per	Cycle
--------	---------------------	---------------------
	1	1644	+/-	41	1644	+/-	41
	2	3302	+/-	58	1658	+/-	41
	3	4839	+/-	70	1537	+/-	39
	4	6531	+/-	81	1692	+/-	41
	5	8035	+/-	90	1504	+/-	39
	6	9644	+/-	99	1609	+/-	40
	7	11151	+/-	106	1507	+/-	39
	8	12652	+/-	113	1501	+/-	39
	9	14145	+/-	120	1493	+/-	39
	10	15813	+/-	126	1668	+/-	41
	11	17441	+/-	133	1628	+/-	41
	12	19005	+/-	139	1564	+/-	40
	13	20525	+/-	144	1520	+/-	39
	14	21998	+/-	149	1473	+/-	39
	15	23506	+/-	154	1508	+/-	39
	16	24933	+/-	159	1427	+/-	38
	17	26257	+/-	163	1324	+/-	37
	18	27703	+/-	167	1446	+/-	38
	19	29132	+/-	172	1429	+/-	38
	20	30575	+/-	176	1443	+/-	38
	21	32062	+/-	180	1487	+/-	39
	22	33417	+/-	184	1355	+/-	37
	23	34886	+/-	188	1469	+/-	39
	24	36291	+/-	192	1405	+/-	38
	25	37621	+/-	195	1330	+/-	37
	26	38926	+/-	198	1305	+/-	36
	27	40254	+/-	202	1328	+/-	37
	28	41657	+/-	205	1403	+/-	38
	29	43016	+/-	209	1359	+/-	37
	30	44380	+/-	212	1364	+/-	37
	31	45752	+/-	215	1372	+/-	37
	32	47116	+/-	218	1364	+/-	37
	33	48518	+/-	221	1402	+/-	38
	34	49899	+/-	225	1381	+/-	37
	35	51152	+/-	227	1253	+/-	36
	36	52504	+/-	230	1352	+/-	37
	37	53703	+/-	233	1199	+/-	35
	38	54918	+/-	236	1215	+/-	35
	39	56175	+/-	238	1257	+/-	36
	40	57448	+/-	241	1273	+/-	36
	41	58704	+/-	244	1256	+/-	36
	42	59923	+/-	246	1219	+/-	35
	43	61249	+/-	249	1326	+/-	37
	44	62620	+/-	252	1371	+/-	37
	45	63848	+/-	254	1228	+/-	35
	46	65151	+/-	257	1303	+/-	36
	47	66409	+/-	259	1258	+/-	36
	48	67609	+/-	261	1200	+/-	35
	49	68675	+/-	264	1066	+/-	33
	50	69885	+/-	266	1210	+/-	35
	51	70986	+/-	268	1101	+/-	33
	52	72133	+/-	270	1147	+/-	34
	53	73436	+/-	273	1303	+/-	36
	54	74734	+/-	275	1298	+/-	36
	55	75820	+/-	277	1086	+/-	33
	56	76820	+/-	279	1000	+/-	32
	57	77978	+/-	281	1158	+/-	34
	58	79060	+/-	283	1082	+/-	33
	59	80196	+/-	285	1136	+/-	34
	60	81383	+/-	287	1187	+/-	35
		S2	AVR Counts per Cycle		1356.38	+/-	37
	Terminal	Count	=	81383	+/-	287
----------------------------------------------------------------------------------------
Measurement	:	DARK	60s	|	Stim	0	|	On/Off(us)	15,15	|	Cycle(ms),No	1000,	60
----------------------------------------------------------------------------------------
Time	(s)	Total	Count	Counts	per	Cycle
--------	---------------------	---------------------
	1	4	+/-	4	4	+/-	4
	2	-8	+/-	6	-12	+/-	5
	3	-4	+/-	7	4	+/-	4
	4	8	+/-	8	12	+/-	5
	5	-5	+/-	9	-13	+/-	5
	6	2	+/-	10	7	+/-	5
	7	15	+/-	11	13	+/-	5
	8	11	+/-	12	-4	+/-	4
	9	-4	+/-	12	-15	+/-	6
	10	-9	+/-	13	-5	+/-	5
	11	-10	+/-	14	-1	+/-	4
	12	-1	+/-	14	9	+/-	5
	13	9	+/-	15	10	+/-	5
	14	-2	+/-	15	-11	+/-	5
	15	4	+/-	16	6	+/-	5
	16	2	+/-	16	-2	+/-	4
	17	-2	+/-	17	-4	+/-	4
	18	5	+/-	17	7	+/-	5
	19	17	+/-	18	12	+/-	5
	20	0	+/-	18	-17	+/-	6
	21	-7	+/-	19	-7	+/-	5
	22	-7	+/-	19	0	+/-	4
	23	-10	+/-	19	-3	+/-	4
	24	-7	+/-	20	3	+/-	4
	25	1	+/-	20	8	+/-	5
	26	6	+/-	21	5	+/-	5
	27	7	+/-	21	1	+/-	4
	28	7	+/-	21	0	+/-	4
	29	2	+/-	22	-5	+/-	5
	30	5	+/-	22	3	+/-	4
	31	10	+/-	22	5	+/-	5
	32	6	+/-	23	-4	+/-	4
	33	14	+/-	23	8	+/-	5
	34	18	+/-	24	4	+/-	4
	35	20	+/-	24	2	+/-	4
	36	21	+/-	24	1	+/-	4
	37	20	+/-	25	-1	+/-	4
	38	10	+/-	25	-10	+/-	5
	39	5	+/-	25	-5	+/-	5
	40	3	+/-	25	-2	+/-	4
	41	4	+/-	26	1	+/-	4
	42	9	+/-	26	5	+/-	5
	43	8	+/-	26	-1	+/-	4
	44	7	+/-	27	-1	+/-	4
	45	8	+/-	27	1	+/-	4
	46	29	+/-	28	21	+/-	6
	47	32	+/-	28	3	+/-	4
	48	28	+/-	28	-4	+/-	4
	49	36	+/-	29	8	+/-	5
	50	38	+/-	29	2	+/-	4
	51	40	+/-	29	2	+/-	4
	52	37	+/-	29	-3	+/-	4
	53	40	+/-	30	3	+/-	4
	54	43	+/-	30	3	+/-	4
	55	48	+/-	30	5	+/-	5
	56	43	+/-	31	-5	+/-	5
	57	42	+/-	31	-1	+/-	4
	58	44	+/-	31	2	+/-	4
	59	37	+/-	31	-7	+/-	5
	60	24	+/-	31	-13	+/-	5
	Terminal	Count	=	24	+/-	31

## Sheet: 5cm
=========================================================================================
Run	Name:	Powick	Hams	Sample	no:	106
Sequence	Name:	Soton	Test	Filename:	Soton	Test
Dark	Count:	16	c/s	Light	Count:	0	c/s
Dark	Count	Correction:	OFF	256	Offset	Subtract:	ON
Datafile	Path:	C:\Results\Soton	Test\Powick	Hams\Powick	Hams\Powick	Hams0106.psl
Summary	Path	:	C:\Results\Soton	Test\Powick	Hams\Powick	Hams\summary\Powick	Hams.sum
Run	Sequence	:	Soton	Test
-----------------------------------------------------------------------------------------
\	5cm	@	2019-03-07	16:10:38	/
	'-------------------------'
----------------------------------------------------------------------------------------
Measurement	:	DARK	60s	|	Stim	0	|	On/Off(us)	15,15	|	Cycle(ms),No	1000,	60
----------------------------------------------------------------------------------------
Time	(s)	Total	Count	Counts	per	Cycle
--------	---------------------	---------------------
	1	1	+/-	4	1	+/-	4
	2	-3	+/-	6	-4	+/-	4
	3	-1	+/-	7	2	+/-	4
	4	1	+/-	8	2	+/-	4
	5	1	+/-	9	0	+/-	4
	6	2	+/-	10	1	+/-	4
	7	-6	+/-	11	-8	+/-	5
	8	-1	+/-	11	5	+/-	5
	9	-6	+/-	12	-5	+/-	5
	10	-4	+/-	13	2	+/-	4
	11	-1	+/-	13	3	+/-	4
	12	-3	+/-	14	-2	+/-	4
	13	4	+/-	15	7	+/-	5
	14	1	+/-	15	-3	+/-	4
	15	19	+/-	16	18	+/-	6
	16	18	+/-	17	-1	+/-	4
	17	13	+/-	17	-5	+/-	5
	18	12	+/-	17	-1	+/-	4
	19	23	+/-	18	11	+/-	5
	20	26	+/-	19	3	+/-	4
	21	28	+/-	19	2	+/-	4
	22	30	+/-	20	2	+/-	4
	23	29	+/-	20	-1	+/-	4
	24	12	+/-	20	-17	+/-	6
	25	11	+/-	20	-1	+/-	4
	26	12	+/-	21	1	+/-	4
	27	3	+/-	21	-9	+/-	5
	28	-3	+/-	21	-6	+/-	5
	29	-2	+/-	22	1	+/-	4
	30	-7	+/-	22	-5	+/-	5
	31	5	+/-	22	12	+/-	5
	32	6	+/-	23	1	+/-	4
	33	2	+/-	23	-4	+/-	4
	34	-1	+/-	23	-3	+/-	4
	35	-4	+/-	24	-3	+/-	4
	36	2	+/-	24	6	+/-	5
	37	-1	+/-	24	-3	+/-	4
	38	-8	+/-	25	-7	+/-	5
	39	-14	+/-	25	-6	+/-	5
	40	-13	+/-	26	1	+/-	4
	41	-7	+/-	26	6	+/-	5
	42	-4	+/-	26	3	+/-	4
	43	-6	+/-	26	-2	+/-	4
	44	-1	+/-	27	5	+/-	5
	45	-3	+/-	27	-2	+/-	4
	46	-8	+/-	27	-5	+/-	5
	47	-7	+/-	28	1	+/-	4
	48	-5	+/-	28	2	+/-	4
	49	-7	+/-	28	-2	+/-	4
	50	-3	+/-	28	4	+/-	4
	51	-7	+/-	29	-4	+/-	4
	52	-5	+/-	29	2	+/-	4
	53	-8	+/-	29	-3	+/-	4
	54	-3	+/-	29	5	+/-	5
	55	-6	+/-	30	-3	+/-	4
	56	0	+/-	30	6	+/-	5
	57	2	+/-	30	2	+/-	4
	58	-3	+/-	31	-5	+/-	5
	59	6	+/-	31	9	+/-	5
	60	10	+/-	31	4	+/-	4
	Terminal	Count	=	10	+/-	31
----------------------------------------------------------------------------------------
Measurement	:	S1	15	15	60s	|	Stim	1	|	On/Off(us)	15,15	|	Cycle(ms),No	1000,	60
----------------------------------------------------------------------------------------
Time	(s)	Total	Count	Counts	per	Cycle
--------	---------------------	---------------------
	1	442	+/-	21	442	+/-	21
	2	799	+/-	29	357	+/-	19
	3	1127	+/-	34	328	+/-	19
	4	1493	+/-	39	366	+/-	20
	5	1804	+/-	43	311	+/-	18
	6	2162	+/-	48	358	+/-	19
	7	2512	+/-	51	350	+/-	19
	8	2908	+/-	55	396	+/-	20
	9	3278	+/-	58	370	+/-	20
	10	3674	+/-	62	396	+/-	20
	11	3997	+/-	65	323	+/-	18
	12	4306	+/-	67	309	+/-	18
	13	4654	+/-	70	348	+/-	19
	14	4965	+/-	72	311	+/-	18
	15	5232	+/-	74	267	+/-	17
	16	5559	+/-	76	327	+/-	19
	17	5894	+/-	79	335	+/-	19
	18	6195	+/-	81	301	+/-	18
	19	6486	+/-	82	291	+/-	18
	20	6822	+/-	85	336	+/-	19
	21	7168	+/-	87	346	+/-	19
	22	7488	+/-	89	320	+/-	18
	23	7795	+/-	90	307	+/-	18
	24	8099	+/-	92	304	+/-	18
	25	8412	+/-	94	313	+/-	18
	26	8668	+/-	95	256	+/-	16
	27	9014	+/-	97	346	+/-	19
	28	9255	+/-	99	241	+/-	16
	29	9474	+/-	100	219	+/-	15
	30	9738	+/-	101	264	+/-	17
	31	10012	+/-	103	274	+/-	17
	32	10317	+/-	104	305	+/-	18
	33	10582	+/-	105	265	+/-	17
	34	10871	+/-	107	289	+/-	17
	35	11150	+/-	108	279	+/-	17
	36	11421	+/-	110	271	+/-	17
	37	11706	+/-	111	285	+/-	17
	38	11981	+/-	112	275	+/-	17
	39	12256	+/-	113	275	+/-	17
	40	12566	+/-	115	310	+/-	18
	41	12876	+/-	116	310	+/-	18
	42	13127	+/-	117	251	+/-	16
	43	13409	+/-	119	282	+/-	17
	44	13655	+/-	120	246	+/-	16
	45	13953	+/-	121	298	+/-	18
	46	14256	+/-	122	303	+/-	18
	47	14506	+/-	124	250	+/-	16
	48	14755	+/-	125	249	+/-	16
	49	15008	+/-	126	253	+/-	16
	50	15295	+/-	127	287	+/-	17
	51	15536	+/-	128	241	+/-	16
	52	15771	+/-	129	235	+/-	16
	53	16039	+/-	130	268	+/-	17
	54	16313	+/-	131	274	+/-	17
	55	16605	+/-	132	292	+/-	18
	56	16847	+/-	133	242	+/-	16
	57	17077	+/-	134	230	+/-	16
	58	17304	+/-	135	227	+/-	16
	59	17570	+/-	136	266	+/-	17
	60	17827	+/-	137	257	+/-	17
		S1	AVR Counts per Cycle		297.117	+/-	17.6333
	Terminal	Count	=	17827	+/-	137
----------------------------------------------------------------------------------------
Measurement	:	S2	15	15	60s	|	Stim	2	|	On/Off(us)	15,15	|	Cycle(ms),No	1000,	60
----------------------------------------------------------------------------------------
Time	(s)	Total	Count	Counts	per	Cycle
--------	---------------------	---------------------
	1	852	+/-	29	852	+/-	29
	2	1757	+/-	42	905	+/-	30
	3	2604	+/-	51	847	+/-	29
	4	3499	+/-	60	895	+/-	30
	5	4419	+/-	67	920	+/-	31
	6	5181	+/-	73	762	+/-	28
	7	5980	+/-	78	799	+/-	29
	8	6790	+/-	83	810	+/-	29
	9	7632	+/-	88	842	+/-	29
	10	8377	+/-	92	745	+/-	28
	11	9202	+/-	97	825	+/-	29
	12	9989	+/-	101	787	+/-	28
	13	10830	+/-	105	841	+/-	29
	14	11628	+/-	109	798	+/-	29
	15	12341	+/-	112	713	+/-	27
	16	13150	+/-	116	809	+/-	29
	17	14036	+/-	120	886	+/-	30
	18	14828	+/-	123	792	+/-	28
	19	15586	+/-	126	758	+/-	28
	20	16355	+/-	129	769	+/-	28
	21	17031	+/-	132	676	+/-	26
	22	17830	+/-	135	799	+/-	29
	23	18642	+/-	138	812	+/-	29
	24	19284	+/-	140	642	+/-	26
	25	19918	+/-	143	634	+/-	25
	26	20649	+/-	145	731	+/-	27
	27	21350	+/-	148	701	+/-	27
	28	22066	+/-	150	716	+/-	27
	29	22877	+/-	153	811	+/-	29
	30	23584	+/-	155	707	+/-	27
	31	24352	+/-	158	768	+/-	28
	32	25031	+/-	160	679	+/-	26
	33	25677	+/-	162	646	+/-	26
	34	26341	+/-	164	664	+/-	26
	35	27025	+/-	166	684	+/-	26
	36	27730	+/-	168	705	+/-	27
	37	28397	+/-	170	667	+/-	26
	38	29102	+/-	172	705	+/-	27
	39	29870	+/-	175	768	+/-	28
	40	30627	+/-	177	757	+/-	28
	41	31374	+/-	179	747	+/-	28
	42	32042	+/-	181	668	+/-	26
	43	32651	+/-	183	609	+/-	25
	44	33354	+/-	185	703	+/-	27
	45	33993	+/-	186	639	+/-	26
	46	34721	+/-	188	728	+/-	27
	47	35434	+/-	190	713	+/-	27
	48	36088	+/-	192	654	+/-	26
	49	36797	+/-	194	709	+/-	27
	50	37451	+/-	196	654	+/-	26
	51	38207	+/-	198	756	+/-	28
	52	38965	+/-	199	758	+/-	28
	53	39657	+/-	201	692	+/-	27
	54	40344	+/-	203	687	+/-	27
	55	41015	+/-	205	671	+/-	26
	56	41677	+/-	206	662	+/-	26
	57	42391	+/-	208	714	+/-	27
	58	42932	+/-	209	541	+/-	24
	59	43620	+/-	211	688	+/-	27
	60	44338	+/-	213	718	+/-	27
		S2	AVR Counts per Cycle		738.967	+/-	27.4833
	Terminal	Count	=	44338	+/-	213
----------------------------------------------------------------------------------------
Measurement	:	DARK	60s	|	Stim	0	|	On/Off(us)	15,15	|	Cycle(ms),No	1000,	60
----------------------------------------------------------------------------------------
Time	(s)	Total	Count	Counts	per	Cycle
--------	---------------------	---------------------
	1	1	+/-	4	1	+/-	4
	2	-2	+/-	6	-3	+/-	4
	3	-4	+/-	7	-2	+/-	4
	4	8	+/-	8	12	+/-	5
	5	3	+/-	9	-5	+/-	5
	6	6	+/-	10	3	+/-	4
	7	4	+/-	11	-2	+/-	4
	8	6	+/-	12	2	+/-	4
	9	21	+/-	13	15	+/-	6
	10	15	+/-	13	-6	+/-	5
	11	13	+/-	14	-2	+/-	4
	12	17	+/-	14	4	+/-	4
	13	30	+/-	15	13	+/-	5
	14	37	+/-	16	7	+/-	5
	15	34	+/-	17	-3	+/-	4
	16	27	+/-	17	-7	+/-	5
	17	23	+/-	17	-4	+/-	4
	18	24	+/-	18	1	+/-	4
	19	28	+/-	18	4	+/-	4
	20	35	+/-	19	7	+/-	5
	21	37	+/-	19	2	+/-	4
	22	37	+/-	20	0	+/-	4
	23	38	+/-	20	1	+/-	4
	24	36	+/-	20	-2	+/-	4
	25	29	+/-	21	-7	+/-	5
	26	27	+/-	21	-2	+/-	4
	27	29	+/-	21	2	+/-	4
	28	11	+/-	21	-18	+/-	6
	29	10	+/-	22	-1	+/-	4
	30	8	+/-	22	-2	+/-	4
	31	8	+/-	22	0	+/-	4
	32	20	+/-	23	12	+/-	5
	33	12	+/-	23	-8	+/-	5
	34	20	+/-	24	8	+/-	5
	35	19	+/-	24	-1	+/-	4
	36	30	+/-	25	11	+/-	5
	37	28	+/-	25	-2	+/-	4
	38	28	+/-	25	0	+/-	4
	39	23	+/-	25	-5	+/-	5
	40	29	+/-	26	6	+/-	5
	41	22	+/-	26	-7	+/-	5
	42	20	+/-	26	-2	+/-	4
	43	20	+/-	27	0	+/-	4
	44	19	+/-	27	-1	+/-	4
	45	15	+/-	27	-4	+/-	4
	46	18	+/-	27	3	+/-	4
	47	17	+/-	28	-1	+/-	4
	48	17	+/-	28	0	+/-	4
	49	24	+/-	28	7	+/-	5
	50	31	+/-	29	7	+/-	5
	51	22	+/-	29	-9	+/-	5
	52	16	+/-	29	-6	+/-	5
	53	22	+/-	29	6	+/-	5
	54	25	+/-	30	3	+/-	4
	55	22	+/-	30	-3	+/-	4
	56	22	+/-	30	0	+/-	4
	57	24	+/-	31	2	+/-	4
	58	23	+/-	31	-1	+/-	4
	59	15	+/-	31	-8	+/-	5
	60	15	+/-	31	0	+/-	4
	Terminal	Count	=	15	+/-	31

## Sheet: 10cm
=========================================================================================
Run	Name:	Powick	Hams	Sample	no:	105
Sequence	Name:	Soton	Test	Filename:	Soton	Test
Dark	Count:	16	c/s	Light	Count:	0	c/s
Dark	Count	Correction:	OFF	256	Offset	Subtract:	ON
Datafile	Path:	C:\Results\Soton	Test\Powick	Hams\Powick	Hams\Powick	Hams0105.psl
Summary	Path	:	C:\Results\Soton	Test\Powick	Hams\Powick	Hams\summary\Powick	Hams.sum
Run	Sequence	:	Soton	Test
-----------------------------------------------------------------------------------------
\	10cm	@	2019-03-07	16:05:57	/
	'--------------------------'
----------------------------------------------------------------------------------------
Measurement	:	DARK	60s	|	Stim	0	|	On/Off(us)	15,15	|	Cycle(ms),No	1000,	60
----------------------------------------------------------------------------------------
Time	(s)	Total	Count	Counts	per	Cycle
--------	---------------------	---------------------
	1	-7	+/-	5	-7	+/-	5
	2	2	+/-	6	9	+/-	5
	3	9	+/-	8	7	+/-	5
	4	-7	+/-	8	-16	+/-	6
	5	-5	+/-	9	2	+/-	4
	6	-13	+/-	10	-8	+/-	5
	7	-13	+/-	11	0	+/-	4
	8	-8	+/-	12	5	+/-	5
	9	-5	+/-	12	3	+/-	4
	10	-4	+/-	13	1	+/-	4
	11	2	+/-	13	6	+/-	5
	12	4	+/-	14	2	+/-	4
	13	10	+/-	15	6	+/-	5
	14	7	+/-	15	-3	+/-	4
	15	13	+/-	16	6	+/-	5
	16	13	+/-	16	0	+/-	4
	17	13	+/-	17	0	+/-	4
	18	12	+/-	17	-1	+/-	4
	19	11	+/-	18	-1	+/-	4
	20	6	+/-	18	-5	+/-	5
	21	7	+/-	19	1	+/-	4
	22	5	+/-	19	-2	+/-	4
	23	7	+/-	19	2	+/-	4
	24	2	+/-	20	-5	+/-	5
	25	4	+/-	20	2	+/-	4
	26	8	+/-	21	4	+/-	4
	27	9	+/-	21	1	+/-	4
	28	12	+/-	21	3	+/-	4
	29	16	+/-	22	4	+/-	4
	30	17	+/-	22	1	+/-	4
	31	22	+/-	23	5	+/-	5
	32	20	+/-	23	-2	+/-	4
	33	23	+/-	23	3	+/-	4
	34	24	+/-	24	1	+/-	4
	35	28	+/-	24	4	+/-	4
	36	28	+/-	25	0	+/-	4
	37	36	+/-	25	8	+/-	5
	38	32	+/-	25	-4	+/-	4
	39	39	+/-	26	7	+/-	5
	40	35	+/-	26	-4	+/-	4
	41	35	+/-	26	0	+/-	4
	42	35	+/-	27	0	+/-	4
	43	41	+/-	27	6	+/-	5
	44	45	+/-	27	4	+/-	4
	45	40	+/-	28	-5	+/-	5
	46	44	+/-	28	4	+/-	4
	47	47	+/-	28	3	+/-	4
	48	46	+/-	29	-1	+/-	4
	49	36	+/-	29	-10	+/-	5
	50	39	+/-	29	3	+/-	4
	51	29	+/-	29	-10	+/-	5
	52	30	+/-	29	1	+/-	4
	53	30	+/-	30	0	+/-	4
	54	36	+/-	30	6	+/-	5
	55	34	+/-	30	-2	+/-	4
	56	35	+/-	31	1	+/-	4
	57	34	+/-	31	-1	+/-	4
	58	38	+/-	31	4	+/-	4
	59	37	+/-	31	-1	+/-	4
	60	36	+/-	32	-1	+/-	4
	Terminal	Count	=	36	+/-	32
----------------------------------------------------------------------------------------
Measurement	:	S1	15	15	60s	|	Stim	1	|	On/Off(us)	15,15	|	Cycle(ms),No	1000,	60
----------------------------------------------------------------------------------------
Time	(s)	Total	Count	Counts	per	Cycle
--------	---------------------	---------------------
	1	273	+/-	17	273	+/-	17
	2	550	+/-	24	277	+/-	17
	3	866	+/-	30	316	+/-	18
	4	1124	+/-	34	258	+/-	17
	5	1421	+/-	39	297	+/-	18
	6	1699	+/-	42	278	+/-	17
	7	1996	+/-	46	297	+/-	18
	8	2314	+/-	49	318	+/-	18
	9	2620	+/-	53	306	+/-	18
	10	2925	+/-	56	305	+/-	18
	11	3257	+/-	59	332	+/-	19
	12	3500	+/-	61	243	+/-	16
	13	3750	+/-	63	250	+/-	16
	14	4004	+/-	65	254	+/-	16
	15	4252	+/-	67	248	+/-	16
	16	4538	+/-	69	286	+/-	17
	17	4813	+/-	71	275	+/-	17
	18	5022	+/-	73	209	+/-	15
	19	5295	+/-	75	273	+/-	17
	20	5559	+/-	77	264	+/-	17
	21	5867	+/-	79	308	+/-	18
	22	6113	+/-	80	246	+/-	16
	23	6392	+/-	82	279	+/-	17
	24	6665	+/-	84	273	+/-	17
	25	6910	+/-	85	245	+/-	16
	26	7165	+/-	87	255	+/-	16
	27	7436	+/-	89	271	+/-	17
	28	7709	+/-	90	273	+/-	17
	29	7944	+/-	92	235	+/-	16
	30	8167	+/-	93	223	+/-	15
	31	8388	+/-	94	221	+/-	15
	32	8629	+/-	96	241	+/-	16
	33	8878	+/-	97	249	+/-	16
	34	9129	+/-	98	251	+/-	16
	35	9392	+/-	100	263	+/-	17
	36	9636	+/-	101	244	+/-	16
	37	9856	+/-	102	220	+/-	15
	38	10109	+/-	104	253	+/-	16
	39	10355	+/-	105	246	+/-	16
	40	10576	+/-	106	221	+/-	15
	41	10786	+/-	107	210	+/-	15
	42	10974	+/-	108	188	+/-	14
	43	11180	+/-	109	206	+/-	15
	44	11437	+/-	110	257	+/-	17
	45	11703	+/-	111	266	+/-	17
	46	11953	+/-	113	250	+/-	16
	47	12191	+/-	114	238	+/-	16
	48	12361	+/-	115	170	+/-	14
	49	12554	+/-	115	193	+/-	14
	50	12784	+/-	117	230	+/-	16
	51	13025	+/-	118	241	+/-	16
	52	13199	+/-	118	174	+/-	14
	53	13438	+/-	120	239	+/-	16
	54	13646	+/-	120	208	+/-	15
	55	13880	+/-	121	234	+/-	16
	56	14093	+/-	122	213	+/-	15
	57	14314	+/-	123	221	+/-	15
	58	14504	+/-	124	190	+/-	14
	59	14766	+/-	125	262	+/-	17
	60	14994	+/-	126	228	+/-	16
		S1	AVR Counts per Cycle		249.9	+/-	16.2167
	Terminal	Count	=	14994	+/-	126
----------------------------------------------------------------------------------------
Measurement	:	S2	15	15	60s	|	Stim	2	|	On/Off(us)	15,15	|	Cycle(ms),No	1000,	60
----------------------------------------------------------------------------------------
Time	(s)	Total	Count	Counts	per	Cycle
--------	---------------------	---------------------
	1	792	+/-	28	792	+/-	28
	2	1538	+/-	40	746	+/-	28
	3	2315	+/-	49	777	+/-	28
	4	3129	+/-	57	814	+/-	29
	5	3739	+/-	62	610	+/-	25
	6	4498	+/-	68	759	+/-	28
	7	5197	+/-	73	699	+/-	27
	8	5918	+/-	78	721	+/-	27
	9	6622	+/-	82	704	+/-	27
	10	7343	+/-	87	721	+/-	27
	11	8098	+/-	91	755	+/-	28
	12	8894	+/-	95	796	+/-	28
	13	9636	+/-	99	742	+/-	28
	14	10388	+/-	103	752	+/-	28
	15	11039	+/-	106	651	+/-	26
	16	11700	+/-	109	661	+/-	26
	17	12441	+/-	113	741	+/-	28
	18	13057	+/-	116	616	+/-	25
	19	13749	+/-	119	692	+/-	27
	20	14475	+/-	122	726	+/-	27
	21	15092	+/-	124	617	+/-	25
	22	15715	+/-	127	623	+/-	25
	23	16322	+/-	129	607	+/-	25
	24	16996	+/-	132	674	+/-	26
	25	17626	+/-	134	630	+/-	25
	26	18336	+/-	137	710	+/-	27
	27	18947	+/-	139	611	+/-	25
	28	19617	+/-	142	670	+/-	26
	29	20300	+/-	144	683	+/-	26
	30	20921	+/-	146	621	+/-	25
	31	21549	+/-	148	628	+/-	25
	32	22250	+/-	151	701	+/-	27
	33	22902	+/-	153	652	+/-	26
	34	23579	+/-	155	677	+/-	26
	35	24190	+/-	157	611	+/-	25
	36	24819	+/-	159	629	+/-	25
	37	25387	+/-	161	568	+/-	24
	38	25982	+/-	163	595	+/-	25
	39	26623	+/-	165	641	+/-	26
	40	27282	+/-	167	659	+/-	26
	41	27991	+/-	169	709	+/-	27
	42	28640	+/-	171	649	+/-	26
	43	29258	+/-	173	618	+/-	25
	44	29918	+/-	175	660	+/-	26
	45	30485	+/-	177	567	+/-	24
	46	31040	+/-	178	555	+/-	24
	47	31638	+/-	178	598	+/-	25
	48	32279	+/-	180	641	+/-	26
	49	32897	+/-	181	618	+/-	25
	50	33448	+/-	183	551	+/-	24
	51	34067	+/-	185	619	+/-	25
	52	34561	+/-	186	494	+/-	23
	53	35186	+/-	188	625	+/-	25
	54	35791	+/-	190	605	+/-	25
	55	36486	+/-	191	695	+/-	27
	56	37077	+/-	193	591	+/-	25
	57	37509	+/-	194	432	+/-	21
	58	38095	+/-	196	586	+/-	25
	59	38637	+/-	197	542	+/-	24
	60	39194	+/-	199	557	+/-	24
		S2	AVR Counts per Cycle		653.233	+/-	25.85
	Terminal	Count	=	39194	+/-	199
----------------------------------------------------------------------------------------
Measurement	:	DARK	60s	|	Stim	0	|	On/Off(us)	15,15	|	Cycle(ms),No	1000,	60
----------------------------------------------------------------------------------------
Time	(s)	Total	Count	Counts	per	Cycle
--------	---------------------	---------------------
	1	-3	+/-	4	-3	+/-	4
	2	-12	+/-	7	-9	+/-	5
	3	-10	+/-	8	2	+/-	4
	4	-20	+/-	9	-10	+/-	5
	5	-12	+/-	10	8	+/-	5
	6	-4	+/-	10	8	+/-	5
	7	-4	+/-	11	0	+/-	4
	8	1	+/-	11	5	+/-	5
	9	12	+/-	12	11	+/-	5
	10	5	+/-	13	-7	+/-	5
	11	8	+/-	14	3	+/-	4
	12	1	+/-	14	-7	+/-	5
	13	1	+/-	14	0	+/-	4
	14	-6	+/-	15	-7	+/-	5
	15	-4	+/-	16	2	+/-	4
	16	-5	+/-	16	-1	+/-	4
	17	-1	+/-	17	4	+/-	4
	18	-6	+/-	17	-5	+/-	5
	19	-3	+/-	18	3	+/-	4
	20	-2	+/-	18	1	+/-	4
	21	3	+/-	18	5	+/-	5
	22	-1	+/-	19	-4	+/-	4
	23	12	+/-	19	13	+/-	5
	24	14	+/-	20	2	+/-	4
	25	0	+/-	20	-14	+/-	5
	26	2	+/-	20	2	+/-	4
	27	-4	+/-	21	-6	+/-	5
	28	-12	+/-	21	-8	+/-	5
	29	-19	+/-	22	-7	+/-	5
	30	-21	+/-	22	-2	+/-	4
	31	-20	+/-	23	1	+/-	4
	32	-20	+/-	23	0	+/-	4
	33	-24	+/-	23	-4	+/-	4
	34	-20	+/-	24	4	+/-	4
	35	-19	+/-	24	1	+/-	4
	36	-17	+/-	24	2	+/-	4
	37	-15	+/-	25	2	+/-	4
	38	-21	+/-	25	-6	+/-	5
	39	-21	+/-	25	0	+/-	4
	40	-24	+/-	26	-3	+/-	4
	41	-23	+/-	26	1	+/-	4
	42	-26	+/-	26	-3	+/-	4
	43	-17	+/-	27	9	+/-	5
	44	-12	+/-	27	5	+/-	5
	45	-12	+/-	27	0	+/-	4
	46	-26	+/-	28	-14	+/-	5
	47	-22	+/-	28	4	+/-	4
	48	-28	+/-	28	-6	+/-	5
	49	-28	+/-	28	0	+/-	4
	50	-31	+/-	29	-3	+/-	4
	51	-27	+/-	29	4	+/-	4
	52	-32	+/-	29	-5	+/-	5
	53	-37	+/-	30	-5	+/-	5
	54	-40	+/-	30	-3	+/-	4
	55	-38	+/-	30	2	+/-	4
	56	-42	+/-	31	-4	+/-	4
	57	-45	+/-	31	-3	+/-	4
	58	-42	+/-	31	3	+/-	4
	59	-44	+/-	31	-2	+/-	4
	60	-47	+/-	32	-3	+/-	4
	Terminal	Count	=	-47	+/-	32

## Sheet: 15cm
=========================================================================================
Run	Name:	Powick	Hams	Sample	no:	104
Sequence	Name:	Soton	Test	Filename:	Soton	Test
Dark	Count:	16	c/s	Light	Count:	0	c/s
Dark	Count	Correction:	OFF	256	Offset	Subtract:	ON
Datafile	Path:	C:\Results\Soton	Test\Powick	Hams\Powick	Hams\Powick	Hams0104.psl
Summary	Path	:	C:\Results\Soton	Test\Powick	Hams\Powick	Hams\summary\Powick	Hams.sum
Run	Sequence	:	Soton	Test
-----------------------------------------------------------------------------------------
\	15cm	@	2019-03-07	16:01:02	/
	'--------------------------'
----------------------------------------------------------------------------------------
Measurement	:	DARK	60s	|	Stim	0	|	On/Off(us)	15,15	|	Cycle(ms),No	1000,	60
----------------------------------------------------------------------------------------
Time	(s)	Total	Count	Counts	per	Cycle
--------	---------------------	---------------------
	1	-2	+/-	4	-2	+/-	4
	2	3	+/-	6	5	+/-	5
	3	3	+/-	7	0	+/-	4
	4	7	+/-	8	4	+/-	4
	5	11	+/-	10	4	+/-	4
	6	8	+/-	10	-3	+/-	4
	7	6	+/-	11	-2	+/-	4
	8	6	+/-	12	0	+/-	4
	9	1	+/-	12	-5	+/-	5
	10	-6	+/-	13	-7	+/-	5
	11	-9	+/-	14	-3	+/-	4
	12	-3	+/-	14	6	+/-	5
	13	-16	+/-	15	-13	+/-	5
	14	-1	+/-	15	15	+/-	6
	15	-1	+/-	16	0	+/-	4
	16	-5	+/-	16	-4	+/-	4
	17	-6	+/-	17	-1	+/-	4
	18	-6	+/-	17	0	+/-	4
	19	-16	+/-	18	-10	+/-	5
	20	-17	+/-	18	-1	+/-	4
	21	-18	+/-	19	-1	+/-	4
	22	-44	+/-	20	-26	+/-	6
	23	-47	+/-	20	-3	+/-	4
	24	-43	+/-	21	4	+/-	4
	25	-43	+/-	21	0	+/-	4
	26	-38	+/-	21	5	+/-	5
	27	-38	+/-	22	0	+/-	4
	28	-44	+/-	22	-6	+/-	5
	29	-44	+/-	23	0	+/-	4
	30	-26	+/-	22	18	+/-	6
	31	-24	+/-	23	2	+/-	4
	32	-17	+/-	23	7	+/-	5
	33	-22	+/-	23	-5	+/-	5
	34	-21	+/-	24	1	+/-	4
	35	-19	+/-	24	2	+/-	4
	36	-17	+/-	24	2	+/-	4
	37	-17	+/-	25	0	+/-	4
	38	-15	+/-	25	2	+/-	4
	39	-12	+/-	25	3	+/-	4
	40	-34	+/-	26	-22	+/-	6
	41	-34	+/-	26	0	+/-	4
	42	-36	+/-	27	-2	+/-	4
	43	-38	+/-	27	-2	+/-	4
	44	-31	+/-	27	7	+/-	5
	45	-29	+/-	27	2	+/-	4
	46	-30	+/-	28	-1	+/-	4
	47	-30	+/-	28	0	+/-	4
	48	-24	+/-	28	6	+/-	5
	49	-26	+/-	28	-2	+/-	4
	50	-24	+/-	29	2	+/-	4
	51	-27	+/-	29	-3	+/-	4
	52	-31	+/-	29	-4	+/-	4
	53	-36	+/-	30	-5	+/-	5
	54	-34	+/-	30	2	+/-	4
	55	-28	+/-	30	6	+/-	5
	56	-32	+/-	30	-4	+/-	4
	57	-25	+/-	31	7	+/-	5
	58	-31	+/-	31	-6	+/-	5
	59	-34	+/-	31	-3	+/-	4
	60	-42	+/-	32	-8	+/-	5
	Terminal	Count	=	-42	+/-	32
----------------------------------------------------------------------------------------
Measurement	:	S1	15	15	60s	|	Stim	1	|	On/Off(us)	15,15	|	Cycle(ms),No	1000,	60
----------------------------------------------------------------------------------------
Time	(s)	Total	Count	Counts	per	Cycle
--------	---------------------	---------------------
	1	328	+/-	19	328	+/-	19
	2	605	+/-	25	277	+/-	17
	3	945	+/-	32	340	+/-	19
	4	1249	+/-	36	304	+/-	18
	5	1600	+/-	41	351	+/-	19
	6	1900	+/-	45	300	+/-	18
	7	2204	+/-	48	304	+/-	18
	8	2510	+/-	51	306	+/-	18
	9	2808	+/-	54	298	+/-	18
	10	3086	+/-	57	278	+/-	17
	11	3428	+/-	60	342	+/-	19
	12	3761	+/-	63	333	+/-	19
	13	4008	+/-	65	247	+/-	16
	14	4305	+/-	67	297	+/-	18
	15	4591	+/-	70	286	+/-	17
	16	4881	+/-	72	290	+/-	17
	17	5066	+/-	73	185	+/-	14
	18	5297	+/-	75	231	+/-	16
	19	5612	+/-	77	315	+/-	18
	20	5839	+/-	78	227	+/-	16
	21	6105	+/-	80	266	+/-	17
	22	6346	+/-	82	241	+/-	16
	23	6607	+/-	84	261	+/-	17
	24	6882	+/-	85	275	+/-	17
	25	7171	+/-	87	289	+/-	17
	26	7405	+/-	88	234	+/-	16
	27	7667	+/-	90	262	+/-	17
	28	7943	+/-	92	276	+/-	17
	29	8145	+/-	93	202	+/-	15
	30	8428	+/-	94	283	+/-	17
	31	8706	+/-	96	278	+/-	17
	32	8956	+/-	97	250	+/-	16
	33	9185	+/-	99	229	+/-	16
	34	9401	+/-	100	216	+/-	15
	35	9682	+/-	101	281	+/-	17
	36	9935	+/-	103	253	+/-	16
	37	10191	+/-	104	256	+/-	16
	38	10457	+/-	105	266	+/-	17
	39	10704	+/-	106	247	+/-	16
	40	10959	+/-	108	255	+/-	16
	41	11234	+/-	109	275	+/-	17
	42	11463	+/-	110	229	+/-	16
	43	11710	+/-	111	247	+/-	16
	44	11989	+/-	113	279	+/-	17
	45	12222	+/-	114	233	+/-	16
	46	12432	+/-	115	210	+/-	15
	47	12671	+/-	116	239	+/-	16
	48	12952	+/-	117	281	+/-	17
	49	13148	+/-	118	196	+/-	15
	50	13388	+/-	119	240	+/-	16
	51	13621	+/-	120	233	+/-	16
	52	13860	+/-	121	239	+/-	16
	53	14133	+/-	122	273	+/-	17
	54	14327	+/-	123	194	+/-	14
	55	14567	+/-	124	240	+/-	16
	56	14789	+/-	125	222	+/-	15
	57	15005	+/-	126	216	+/-	15
	58	15229	+/-	127	224	+/-	15
	59	15437	+/-	128	208	+/-	15
	60	15638	+/-	129	201	+/-	15
		S1	AVR Counts per Cycle		260.633	+/-	16.5667
	Terminal	Count	=	15638	+/-	129
----------------------------------------------------------------------------------------
Measurement	:	S2	15	15	60s	|	Stim	2	|	On/Off(us)	15,15	|	Cycle(ms),No	1000,	60
----------------------------------------------------------------------------------------
Time	(s)	Total	Count	Counts	per	Cycle
--------	---------------------	---------------------
	1	704	+/-	27	704	+/-	27
	2	1466	+/-	39	762	+/-	28
	3	2168	+/-	47	702	+/-	27
	4	2936	+/-	55	768	+/-	28
	5	3650	+/-	61	714	+/-	27
	6	4408	+/-	67	758	+/-	28
	7	5052	+/-	72	644	+/-	26
	8	5743	+/-	77	691	+/-	27
	9	6481	+/-	81	738	+/-	27
	10	7151	+/-	86	670	+/-	26
	11	7910	+/-	90	759	+/-	28
	12	8697	+/-	94	787	+/-	28
	13	9466	+/-	98	769	+/-	28
	14	10199	+/-	102	733	+/-	27
	15	10816	+/-	105	617	+/-	25
	16	11545	+/-	109	729	+/-	27
	17	12256	+/-	112	711	+/-	27
	18	12943	+/-	115	687	+/-	27
	19	13711	+/-	118	768	+/-	28
	20	14545	+/-	122	834	+/-	29
	21	15304	+/-	125	759	+/-	28
	22	16063	+/-	128	759	+/-	28
	23	16715	+/-	131	652	+/-	26
	24	17370	+/-	133	655	+/-	26
	25	18091	+/-	136	721	+/-	27
	26	18826	+/-	139	735	+/-	27
	27	19546	+/-	141	720	+/-	27
	28	20225	+/-	144	679	+/-	26
	29	20839	+/-	146	614	+/-	25
	30	21528	+/-	148	689	+/-	27
	31	22183	+/-	151	655	+/-	26
	32	22843	+/-	153	660	+/-	26
	33	23592	+/-	155	749	+/-	28
	34	24330	+/-	158	738	+/-	27
	35	25004	+/-	160	674	+/-	26
	36	25716	+/-	162	712	+/-	27
	37	26383	+/-	164	667	+/-	26
	38	27044	+/-	166	661	+/-	26
	39	27773	+/-	169	729	+/-	27
	40	28400	+/-	170	627	+/-	25
	41	29072	+/-	172	672	+/-	26
	42	29711	+/-	174	639	+/-	26
	43	30282	+/-	176	571	+/-	24
	44	30922	+/-	178	640	+/-	26
	45	31502	+/-	180	580	+/-	24
	46	32131	+/-	181	629	+/-	25
	47	32720	+/-	183	589	+/-	25
	48	33309	+/-	185	589	+/-	25
	49	33884	+/-	186	575	+/-	24
	50	34518	+/-	188	634	+/-	25
	51	35144	+/-	190	626	+/-	25
	52	35700	+/-	191	556	+/-	24
	53	36333	+/-	193	633	+/-	25
	54	37037	+/-	195	704	+/-	27
	55	37685	+/-	196	648	+/-	26
	56	38340	+/-	198	655	+/-	26
	57	38895	+/-	200	555	+/-	24
	58	39509	+/-	201	614	+/-	25
	59	40127	+/-	203	618	+/-	25
	60	40729	+/-	204	602	+/-	25
		S2	AVR Counts per Cycle		678.817	+/-	26.3
	Terminal	Count	=	40729	+/-	204
----------------------------------------------------------------------------------------
Measurement	:	DARK	60s	|	Stim	0	|	On/Off(us)	15,15	|	Cycle(ms),No	1000,	60
----------------------------------------------------------------------------------------
Time	(s)	Total	Count	Counts	per	Cycle
--------	---------------------	---------------------
	1	3	+/-	4	3	+/-	4
	2	10	+/-	6	7	+/-	5
	3	12	+/-	8	2	+/-	4
	4	7	+/-	8	-5	+/-	5
	5	-1	+/-	9	-8	+/-	5
	6	0	+/-	10	1	+/-	4
	7	-6	+/-	11	-6	+/-	5
	8	-6	+/-	12	0	+/-	4
	9	-9	+/-	12	-3	+/-	4
	10	-8	+/-	13	1	+/-	4
	11	-10	+/-	14	-2	+/-	4
	12	-7	+/-	14	3	+/-	4
	13	-14	+/-	15	-7	+/-	5
	14	-13	+/-	15	1	+/-	4
	15	-256	+/-	22	-243	+/-	16
	16	-262	+/-	23	-6	+/-	5
	17	-260	+/-	23	2	+/-	4
	18	-259	+/-	23	1	+/-	4
	19	-264	+/-	24	-5	+/-	5
	20	-264	+/-	24	0	+/-	4
	21	-266	+/-	25	-2	+/-	4
	22	-266	+/-	25	0	+/-	4
	23	-262	+/-	25	4	+/-	4
	24	-277	+/-	26	-15	+/-	6
	25	-271	+/-	26	6	+/-	5
	26	-276	+/-	26	-5	+/-	5
	27	-283	+/-	27	-7	+/-	5
	28	-272	+/-	27	11	+/-	5
	29	-265	+/-	27	7	+/-	5
	30	-264	+/-	27	1	+/-	4
	31	-260	+/-	27	4	+/-	4
	32	-256	+/-	28	4	+/-	4
	33	-257	+/-	28	-1	+/-	4
	34	-253	+/-	28	4	+/-	4
	35	-252	+/-	28	1	+/-	4
	36	-248	+/-	29	4	+/-	4
	37	-239	+/-	29	9	+/-	5
	38	-234	+/-	29	5	+/-	5
	39	-243	+/-	29	-9	+/-	5
	40	-248	+/-	30	-5	+/-	5
	41	-257	+/-	30	-9	+/-	5
	42	-262	+/-	31	-5	+/-	5
	43	-264	+/-	31	-2	+/-	4
	44	-262	+/-	31	2	+/-	4
	45	-262	+/-	31	0	+/-	4
	46	-270	+/-	32	-8	+/-	5
	47	-266	+/-	32	4	+/-	4
	48	-273	+/-	32	-7	+/-	5
	49	-283	+/-	33	-10	+/-	5
	50	-284	+/-	33	-1	+/-	4
	51	-275	+/-	33	9	+/-	5
	52	-280	+/-	33	-5	+/-	5
	53	-281	+/-	34	-1	+/-	4
	54	-285	+/-	34	-4	+/-	4
	55	-283	+/-	34	2	+/-	4
	56	-278	+/-	34	5	+/-	5
	57	-275	+/-	34	3	+/-	4
	58	-277	+/-	35	-2	+/-	4
	59	-269	+/-	35	8	+/-	5
	60	-272	+/-	35	-3	+/-	4
	Terminal	Count	=	-272	+/-	35

## Sheet: 20cm
=========================================================================================
Run	Name:	Powick	Hams	Sample	no:	103
Sequence	Name:	Soton	Test	Filename:	Soton	Test
Dark	Count:	16	c/s	Light	Count:	0	c/s
Dark	Count	Correction:	OFF	256	Offset	Subtract:	ON
Datafile	Path:	C:\Results\Soton	Test\Powick	Hams\Powick	Hams\Powick	Hams0103.psl
Summary	Path	:	C:\Results\Soton	Test\Powick	Hams\Powick	Hams\summary\Powick	Hams.sum
Run	Sequence	:	Soton	Test
-----------------------------------------------------------------------------------------
\	20cm	@	2019-03-07	15:56:07	/
	'--------------------------'
----------------------------------------------------------------------------------------
Measurement	:	DARK	60s	|	Stim	0	|	On/Off(us)	15,15	|	Cycle(ms),No	1000,	60
----------------------------------------------------------------------------------------
Time	(s)	Total	Count	Counts	per	Cycle
--------	---------------------	---------------------
	1	2	+/-	4	2	+/-	4
	2	5	+/-	6	3	+/-	4
	3	-2	+/-	7	-7	+/-	5
	4	-9	+/-	9	-7	+/-	5
	5	-4	+/-	9	5	+/-	5
	6	-10	+/-	10	-6	+/-	5
	7	-15	+/-	11	-5	+/-	5
	8	-9	+/-	12	6	+/-	5
	9	-10	+/-	12	-1	+/-	4
	10	-11	+/-	13	-1	+/-	4
	11	-30	+/-	14	-19	+/-	6
	12	-30	+/-	15	0	+/-	4
	13	-35	+/-	16	-5	+/-	5
	14	-39	+/-	16	-4	+/-	4
	15	-42	+/-	17	-3	+/-	4
	16	-40	+/-	17	2	+/-	4
	17	-35	+/-	18	5	+/-	5
	18	-45	+/-	18	-10	+/-	5
	19	-48	+/-	19	-3	+/-	4
	20	-57	+/-	19	-9	+/-	5
	21	-55	+/-	20	2	+/-	4
	22	-46	+/-	20	9	+/-	5
	23	-50	+/-	20	-4	+/-	4
	24	-51	+/-	21	-1	+/-	4
	25	-55	+/-	21	-4	+/-	4
	26	-57	+/-	22	-2	+/-	4
	27	-55	+/-	22	2	+/-	4
	28	-51	+/-	22	4	+/-	4
	29	-43	+/-	23	8	+/-	5
	30	-48	+/-	23	-5	+/-	5
	31	-45	+/-	23	3	+/-	4
	32	-46	+/-	24	-1	+/-	4
	33	-40	+/-	24	6	+/-	5
	34	-41	+/-	24	-1	+/-	4
	35	-39	+/-	24	2	+/-	4
	36	-41	+/-	25	-2	+/-	4
	37	-45	+/-	25	-4	+/-	4
	38	-43	+/-	26	2	+/-	4
	39	-43	+/-	26	0	+/-	4
	40	-45	+/-	26	-2	+/-	4
	41	-46	+/-	26	-1	+/-	4
	42	-43	+/-	27	3	+/-	4
	43	-41	+/-	27	2	+/-	4
	44	-44	+/-	27	-3	+/-	4
	45	-59	+/-	28	-15	+/-	6
	46	-63	+/-	28	-4	+/-	4
	47	-67	+/-	29	-4	+/-	4
	48	-57	+/-	29	10	+/-	5
	49	-50	+/-	29	7	+/-	5
	50	-50	+/-	29	0	+/-	4
	51	-55	+/-	30	-5	+/-	5
	52	-55	+/-	30	0	+/-	4
	53	-54	+/-	30	1	+/-	4
	54	-50	+/-	30	4	+/-	4
	55	-47	+/-	30	3	+/-	4
	56	-46	+/-	31	1	+/-	4
	57	-49	+/-	31	-3	+/-	4
	58	-50	+/-	31	-1	+/-	4
	59	-49	+/-	32	1	+/-	4
	60	-61	+/-	32	-12	+/-	5
	Terminal	Count	=	-61	+/-	32
----------------------------------------------------------------------------------------
Measurement	:	S1	15	15	60s	|	Stim	1	|	On/Off(us)	15,15	|	Cycle(ms),No	1000,	60
----------------------------------------------------------------------------------------
Time	(s)	Total	Count	Counts	per	Cycle
--------	---------------------	---------------------
	1	315	+/-	18	315	+/-	18
	2	571	+/-	25	256	+/-	16
	3	870	+/-	30	299	+/-	18
	4	1202	+/-	36	332	+/-	19
	5	1447	+/-	39	245	+/-	16
	6	1710	+/-	42	263	+/-	17
	7	2021	+/-	46	311	+/-	18
	8	2280	+/-	49	259	+/-	17
	9	2562	+/-	52	282	+/-	17
	10	2877	+/-	55	315	+/-	18
	11	3106	+/-	57	229	+/-	16
	12	3389	+/-	60	283	+/-	17
	13	3668	+/-	62	279	+/-	17
	14	3873	+/-	64	205	+/-	15
	15	4158	+/-	66	285	+/-	17
	16	4407	+/-	68	249	+/-	16
	17	4663	+/-	70	256	+/-	16
	18	4880	+/-	72	217	+/-	15
	19	5105	+/-	74	225	+/-	16
	20	5383	+/-	76	278	+/-	17
	21	5624	+/-	77	241	+/-	16
	22	5886	+/-	79	262	+/-	17
	23	6128	+/-	81	242	+/-	16
	24	6364	+/-	82	236	+/-	16
	25	6635	+/-	84	271	+/-	17
	26	6893	+/-	85	258	+/-	17
	27	7123	+/-	87	230	+/-	16
	28	7385	+/-	89	262	+/-	17
	29	7603	+/-	90	218	+/-	15
	30	7804	+/-	91	201	+/-	15
	31	8068	+/-	93	264	+/-	17
	32	8331	+/-	94	263	+/-	17
	33	8579	+/-	95	248	+/-	16
	34	8884	+/-	97	305	+/-	18
	35	9101	+/-	98	217	+/-	15
	36	9344	+/-	100	243	+/-	16
	37	9551	+/-	101	207	+/-	15
	38	9826	+/-	102	275	+/-	17
	39	10104	+/-	104	278	+/-	17
	40	10312	+/-	105	208	+/-	15
	41	10474	+/-	105	162	+/-	13
	42	10719	+/-	107	245	+/-	16
	43	10887	+/-	108	168	+/-	14
	44	11143	+/-	109	256	+/-	16
	45	11339	+/-	110	196	+/-	15
	46	11575	+/-	111	236	+/-	16
	47	11808	+/-	112	233	+/-	16
	48	12052	+/-	113	244	+/-	16
	49	12287	+/-	114	235	+/-	16
	50	12507	+/-	115	220	+/-	15
	51	12679	+/-	116	172	+/-	14
	52	12916	+/-	117	237	+/-	16
	53	13145	+/-	118	229	+/-	16
	54	13348	+/-	119	203	+/-	15
	55	13554	+/-	120	206	+/-	15
	56	13762	+/-	121	208	+/-	15
	57	13947	+/-	122	185	+/-	14
	58	14169	+/-	123	222	+/-	15
	59	14376	+/-	124	207	+/-	15
	60	14574	+/-	125	198	+/-	15
		S1	AVR Counts per Cycle		242.9	+/-	16.0667
	Terminal	Count	=	14574	+/-	125
----------------------------------------------------------------------------------------
Measurement	:	S2	15	15	60s	|	Stim	2	|	On/Off(us)	15,15	|	Cycle(ms),No	1000,	60
----------------------------------------------------------------------------------------
Time	(s)	Total	Count	Counts	per	Cycle
--------	---------------------	---------------------
	1	783	+/-	28	783	+/-	28
	2	1526	+/-	39	743	+/-	28
	3	2365	+/-	49	839	+/-	29
	4	3151	+/-	57	786	+/-	28
	5	3980	+/-	64	829	+/-	29
	6	4700	+/-	69	720	+/-	27
	7	5479	+/-	75	779	+/-	28
	8	6231	+/-	80	752	+/-	28
	9	6950	+/-	84	719	+/-	27
	10	7766	+/-	89	816	+/-	29
	11	8529	+/-	93	763	+/-	28
	12	9251	+/-	97	722	+/-	27
	13	9983	+/-	101	732	+/-	27
	14	10735	+/-	105	752	+/-	28
	15	11413	+/-	108	678	+/-	26
	16	12115	+/-	111	702	+/-	27
	17	12859	+/-	115	744	+/-	28
	18	13566	+/-	118	707	+/-	27
	19	14306	+/-	121	740	+/-	27
	20	15021	+/-	124	715	+/-	27
	21	15722	+/-	127	701	+/-	27
	22	16392	+/-	129	670	+/-	26
	23	16998	+/-	132	606	+/-	25
	24	17672	+/-	134	674	+/-	26
	25	18345	+/-	137	673	+/-	26
	26	19073	+/-	140	728	+/-	27
	27	19793	+/-	142	720	+/-	27
	28	20464	+/-	145	671	+/-	26
	29	21122	+/-	147	658	+/-	26
	30	21774	+/-	149	652	+/-	26
	31	22498	+/-	152	724	+/-	27
	32	23190	+/-	154	692	+/-	27
	33	23859	+/-	156	669	+/-	26
	34	24587	+/-	159	728	+/-	27
	35	25322	+/-	161	735	+/-	27
	36	26123	+/-	163	801	+/-	29
	37	26790	+/-	165	667	+/-	26
	38	27490	+/-	168	700	+/-	27
	39	28150	+/-	170	660	+/-	26
	40	28843	+/-	172	693	+/-	27
	41	29577	+/-	174	734	+/-	27
	42	30141	+/-	176	564	+/-	24
	43	30822	+/-	178	681	+/-	26
	44	31430	+/-	179	608	+/-	25
	45	32127	+/-	181	697	+/-	27
	46	32737	+/-	183	610	+/-	25
	47	33366	+/-	185	629	+/-	25
	48	33993	+/-	186	627	+/-	25
	49	34551	+/-	188	558	+/-	24
	50	35226	+/-	190	675	+/-	26
	51	35833	+/-	191	607	+/-	25
	52	36478	+/-	193	645	+/-	26
	53	36849	+/-	194	371	+/-	20
	54	37508	+/-	196	659	+/-	26
	55	38088	+/-	197	580	+/-	24
	56	38720	+/-	199	632	+/-	25
	57	39373	+/-	201	653	+/-	26
	58	39942	+/-	202	569	+/-	24
	59	40543	+/-	204	601	+/-	25
	60	41069	+/-	205	526	+/-	23
		S2	AVR Counts per Cycle		684.483	+/-	26.3667
	Terminal	Count	=	41069	+/-	205
----------------------------------------------------------------------------------------
Measurement	:	DARK	60s	|	Stim	0	|	On/Off(us)	15,15	|	Cycle(ms),No	1000,	60
----------------------------------------------------------------------------------------
Time	(s)	Total	Count	Counts	per	Cycle
--------	---------------------	---------------------
	1	-4	+/-	4	-4	+/-	4
	2	-1	+/-	6	3	+/-	4
	3	6	+/-	7	7	+/-	5
	4	-8	+/-	8	-14	+/-	5
	5	-11	+/-	10	-3	+/-	4
	6	-6	+/-	10	5	+/-	5
	7	-8	+/-	11	-2	+/-	4
	8	-10	+/-	12	-2	+/-	4
	9	-8	+/-	12	2	+/-	4
	10	-8	+/-	13	0	+/-	4
	11	-2	+/-	13	6	+/-	5
	12	12	+/-	14	14	+/-	5
	13	21	+/-	15	9	+/-	5
	14	21	+/-	16	0	+/-	4
	15	26	+/-	16	5	+/-	5
	16	28	+/-	17	2	+/-	4
	17	32	+/-	17	4	+/-	4
	18	38	+/-	18	6	+/-	5
	19	29	+/-	18	-9	+/-	5
	20	34	+/-	19	5	+/-	5
	21	42	+/-	19	8	+/-	5
	22	39	+/-	20	-3	+/-	4
	23	38	+/-	20	-1	+/-	4
	24	29	+/-	20	-9	+/-	5
	25	32	+/-	21	3	+/-	4
	26	34	+/-	21	2	+/-	4
	27	38	+/-	22	4	+/-	4
	28	42	+/-	22	4	+/-	4
	29	34	+/-	22	-8	+/-	5
	30	39	+/-	23	5	+/-	5
	31	34	+/-	23	-5	+/-	5
	32	32	+/-	23	-2	+/-	4
	33	28	+/-	24	-4	+/-	4
	34	33	+/-	24	5	+/-	5
	35	29	+/-	24	-4	+/-	4
	36	29	+/-	25	0	+/-	4
	37	34	+/-	25	5	+/-	5
	38	34	+/-	25	0	+/-	4
	39	29	+/-	26	-5	+/-	5
	40	29	+/-	26	0	+/-	4
	41	28	+/-	26	-1	+/-	4
	42	11	+/-	26	-17	+/-	6
	43	13	+/-	26	2	+/-	4
	44	-3	+/-	27	-16	+/-	6
	45	-7	+/-	27	-4	+/-	4
	46	-10	+/-	27	-3	+/-	4
	47	-19	+/-	28	-9	+/-	5
	48	-16	+/-	28	3	+/-	4
	49	-16	+/-	28	0	+/-	4
	50	-23	+/-	29	-7	+/-	5
	51	-24	+/-	29	-1	+/-	4
	52	-30	+/-	29	-6	+/-	5
	53	-22	+/-	29	8	+/-	5
	54	-22	+/-	30	0	+/-	4
	55	-24	+/-	30	-2	+/-	4
	56	-17	+/-	30	7	+/-	5
	57	-21	+/-	31	-4	+/-	4
	58	-29	+/-	31	-8	+/-	5
	59	-24	+/-	31	5	+/-	5
	60	-21	+/-	31	3	+/-	4
	Terminal	Count	=	-21	+/-	31

## Sheet: 25cm
=========================================================================================
Run	Name:	Powick	Hams	Sample	no:	102
Sequence	Name:	Soton	Test	Filename:	Soton	Test
Dark	Count:	16	c/s	Light	Count:	0	c/s
Dark	Count	Correction:	OFF	256	Offset	Subtract:	ON
Datafile	Path:	C:\Results\Soton	Test\Powick	Hams\Powick	Hams\Powick	Hams0102.psl
Summary	Path	:	C:\Results\Soton	Test\Powick	Hams\Powick	Hams\summary\Powick	Hams.sum
Run	Sequence	:	Soton	Test
-----------------------------------------------------------------------------------------
\	25cm	@	2019-03-07	15:51:22	/
	'--------------------------'
----------------------------------------------------------------------------------------
Measurement	:	DARK	60s	|	Stim	0	|	On/Off(us)	15,15	|	Cycle(ms),No	1000,	60
----------------------------------------------------------------------------------------
Time	(s)	Total	Count	Counts	per	Cycle
--------	---------------------	---------------------
	1	0	+/-	4	0	+/-	4
	2	2	+/-	6	2	+/-	4
	3	12	+/-	8	10	+/-	5
	4	8	+/-	8	-4	+/-	4
	5	12	+/-	10	4	+/-	4
	6	17	+/-	11	5	+/-	5
	7	1	+/-	11	-16	+/-	6
	8	5	+/-	12	4	+/-	4
	9	8	+/-	12	3	+/-	4
	10	2	+/-	13	-6	+/-	5
	11	1	+/-	13	-1	+/-	4
	12	-2	+/-	14	-3	+/-	4
	13	-2	+/-	14	0	+/-	4
	14	-1	+/-	15	1	+/-	4
	15	4	+/-	16	5	+/-	5
	16	-6	+/-	16	-10	+/-	5
	17	-5	+/-	17	1	+/-	4
	18	-5	+/-	17	0	+/-	4
	19	2	+/-	17	7	+/-	5
	20	7	+/-	18	5	+/-	5
	21	7	+/-	19	0	+/-	4
	22	11	+/-	19	4	+/-	4
	23	6	+/-	19	-5	+/-	5
	24	6	+/-	20	0	+/-	4
	25	15	+/-	20	9	+/-	5
	26	19	+/-	21	4	+/-	4
	27	22	+/-	21	3	+/-	4
	28	27	+/-	22	5	+/-	5
	29	30	+/-	22	3	+/-	4
	30	30	+/-	23	0	+/-	4
	31	28	+/-	23	-2	+/-	4
	32	33	+/-	23	5	+/-	5
	33	33	+/-	24	0	+/-	4
	34	28	+/-	24	-5	+/-	5
	35	24	+/-	24	-4	+/-	4
	36	27	+/-	25	3	+/-	4
	37	25	+/-	25	-2	+/-	4
	38	28	+/-	25	3	+/-	4
	39	28	+/-	26	0	+/-	4
	40	36	+/-	26	8	+/-	5
	41	39	+/-	26	3	+/-	4
	42	50	+/-	27	11	+/-	5
	43	51	+/-	27	1	+/-	4
	44	54	+/-	28	3	+/-	4
	45	57	+/-	28	3	+/-	4
	46	72	+/-	28	15	+/-	6
	47	37	+/-	28	-35	+/-	7
	48	35	+/-	28	-2	+/-	4
	49	34	+/-	29	-1	+/-	4
	50	38	+/-	29	4	+/-	4
	51	27	+/-	29	-11	+/-	5
	52	21	+/-	29	-6	+/-	5
	53	30	+/-	30	9	+/-	5
	54	25	+/-	30	-5	+/-	5
	55	20	+/-	30	-5	+/-	5
	56	20	+/-	30	0	+/-	4
	57	19	+/-	31	-1	+/-	4
	58	18	+/-	31	-1	+/-	4
	59	18	+/-	31	0	+/-	4
	60	12	+/-	31	-6	+/-	5
	Terminal	Count	=	12	+/-	31
----------------------------------------------------------------------------------------
Measurement	:	S1	15	15	60s	|	Stim	1	|	On/Off(us)	15,15	|	Cycle(ms),No	1000,	60
----------------------------------------------------------------------------------------
Time	(s)	Total	Count	Counts	per	Cycle
--------	---------------------	---------------------
	1	359	+/-	19	359	+/-	19
	2	696	+/-	27	337	+/-	19
	3	1078	+/-	34	382	+/-	20
	4	1339	+/-	37	261	+/-	17
	5	1707	+/-	42	368	+/-	20
	6	2069	+/-	47	362	+/-	19
	7	2382	+/-	50	313	+/-	18
	8	2706	+/-	53	324	+/-	18
	9	3071	+/-	57	365	+/-	20
	10	3440	+/-	60	369	+/-	20
	11	3774	+/-	63	334	+/-	19
	12	4089	+/-	65	315	+/-	18
	13	4403	+/-	68	314	+/-	18
	14	4740	+/-	70	337	+/-	19
	15	5090	+/-	73	350	+/-	19
	16	5254	+/-	74	164	+/-	13
	17	5606	+/-	77	352	+/-	19
	18	5896	+/-	79	290	+/-	17
	19	6231	+/-	81	335	+/-	19
	20	6589	+/-	83	358	+/-	19
	21	6889	+/-	85	300	+/-	18
	22	7202	+/-	87	313	+/-	18
	23	7462	+/-	88	260	+/-	17
	24	7779	+/-	90	317	+/-	18
	25	8080	+/-	92	301	+/-	18
	26	8378	+/-	94	298	+/-	18
	27	8710	+/-	96	332	+/-	19
	28	9070	+/-	98	360	+/-	19
	29	9328	+/-	99	258	+/-	17
	30	9599	+/-	100	271	+/-	17
	31	9857	+/-	102	258	+/-	17
	32	10121	+/-	103	264	+/-	17
	33	10443	+/-	105	322	+/-	18
	34	10728	+/-	106	285	+/-	17
	35	11023	+/-	108	295	+/-	18
	36	11360	+/-	109	337	+/-	19
	37	11671	+/-	111	311	+/-	18
	38	11908	+/-	112	237	+/-	16
	39	12172	+/-	113	264	+/-	17
	40	12444	+/-	114	272	+/-	17
	41	12683	+/-	115	239	+/-	16
	42	12873	+/-	116	190	+/-	14
	43	13187	+/-	118	314	+/-	18
	44	13501	+/-	119	314	+/-	18
	45	13780	+/-	120	279	+/-	17
	46	13996	+/-	121	216	+/-	15
	47	14277	+/-	123	281	+/-	17
	48	14539	+/-	124	262	+/-	17
	49	14781	+/-	125	242	+/-	16
	50	15063	+/-	126	282	+/-	17
	51	15328	+/-	127	265	+/-	17
	52	15605	+/-	128	277	+/-	17
	53	15834	+/-	129	229	+/-	16
	54	16082	+/-	130	248	+/-	16
	55	16299	+/-	131	217	+/-	15
	56	16524	+/-	132	225	+/-	16
	57	16769	+/-	133	245	+/-	16
	58	17017	+/-	134	248	+/-	16
	59	17301	+/-	135	284	+/-	17
	60	17571	+/-	136	270	+/-	17
		S1	AVR Counts per Cycle		292.85	+/-	17.5167
	Terminal	Count	=	17571	+/-	136
----------------------------------------------------------------------------------------
Measurement	:	S2	15	15	60s	|	Stim	2	|	On/Off(us)	15,15	|	Cycle(ms),No	1000,	60
----------------------------------------------------------------------------------------
Time	(s)	Total	Count	Counts	per	Cycle
--------	---------------------	---------------------
	1	991	+/-	32	991	+/-	32
	2	1970	+/-	45	979	+/-	32
	3	2862	+/-	54	892	+/-	30
	4	3291	+/-	58	429	+/-	21
	5	4084	+/-	65	793	+/-	28
	6	4965	+/-	71	881	+/-	30
	7	5748	+/-	77	783	+/-	28
	8	6551	+/-	82	803	+/-	29
	9	7478	+/-	87	927	+/-	31
	10	8222	+/-	92	744	+/-	28
	11	9114	+/-	96	892	+/-	30
	12	9912	+/-	101	798	+/-	29
	13	10833	+/-	105	921	+/-	31
	14	11582	+/-	109	749	+/-	28
	15	12425	+/-	113	843	+/-	29
	16	13327	+/-	117	902	+/-	30
	17	14186	+/-	120	859	+/-	30
	18	15001	+/-	124	815	+/-	29
	19	15750	+/-	127	749	+/-	28
	20	16553	+/-	130	803	+/-	29
	21	17467	+/-	133	914	+/-	30
	22	18245	+/-	136	778	+/-	28
	23	19007	+/-	139	762	+/-	28
	24	19812	+/-	142	805	+/-	29
	25	20566	+/-	145	754	+/-	28
	26	21307	+/-	147	741	+/-	28
	27	22111	+/-	150	804	+/-	29
	28	22792	+/-	152	681	+/-	26
	29	23618	+/-	155	826	+/-	29
	30	24424	+/-	130	806	+/-	28.5
	31	25210	+/-	133	786	+/-	28
	32	25946	+/-	136	736	+/-	27
	33	26746	+/-	139	800	+/-	29
	34	27499	+/-	142	753	+/-	28
	35	28341	+/-	145	842	+/-	29
	36	29109	+/-	147	768	+/-	28
	37	29974	+/-	150	865	+/-	30
	38	30712	+/-	153	738	+/-	27
	39	31566	+/-	156	854	+/-	29
	40	32312	+/-	158	746	+/-	28
	41	33134	+/-	161	822	+/-	29
	42	33802	+/-	163	668	+/-	26
	43	34551	+/-	165	749	+/-	28
	44	35296	+/-	168	745	+/-	28
	45	36180	+/-	170	884	+/-	30
	46	36880	+/-	172	700	+/-	27
	47	37663	+/-	175	783	+/-	28
	48	38367	+/-	177	704	+/-	27
	49	39076	+/-	179	709	+/-	27
	50	39756	+/-	181	680	+/-	26
	51	40494	+/-	183	738	+/-	27
	52	41281	+/-	185	787	+/-	28
	53	42043	+/-	187	762	+/-	28
	54	42799	+/-	189	756	+/-	28
	55	43553	+/-	191	754	+/-	28
	56	44265	+/-	193	712	+/-	27
	57	44879	+/-	195	614	+/-	25
	58	45748	+/-	197	869	+/-	30
	59	46548	+/-	199	800	+/-	29
	60	47309	+/-	201	761	+/-	28
		S2	AVR Counts per Cycle		788.483	+/-	28.375
	Terminal	Count	=	47309	+/-	201
----------------------------------------------------------------------------------------
Measurement	:	DARK	60s	|	Stim	0	|	On/Off(us)	15,15	|	Cycle(ms),No	1000,	60
----------------------------------------------------------------------------------------
Time	(s)	Total	Count	Counts	per	Cycle
--------	---------------------	---------------------
	1	-2	+/-	4	-2	+/-	4
	2	2	+/-	6	4	+/-	4
	3	5	+/-	7	3	+/-	4
	4	32	+/-	10	27	+/-	7
	5	17	+/-	10	-15	+/-	6
	6	20	+/-	11	3	+/-	4
	7	18	+/-	11	-2	+/-	4
	8	2	+/-	11	-16	+/-	6
	9	5	+/-	12	3	+/-	4
	10	-7	+/-	13	-12	+/-	5
	11	-23	+/-	14	-16	+/-	6
	12	-18	+/-	14	5	+/-	5
	13	-12	+/-	15	6	+/-	5
	14	-17	+/-	16	-5	+/-	5
	15	-9	+/-	16	8	+/-	5
	16	-7	+/-	16	2	+/-	4
	17	-1	+/-	17	6	+/-	5
	18	-7	+/-	17	-6	+/-	5
	19	-6	+/-	18	1	+/-	4
	20	-13	+/-	18	-7	+/-	5
	21	-6	+/-	18	7	+/-	5
	22	-12	+/-	19	-6	+/-	5
	23	-18	+/-	20	-6	+/-	5
	24	-27	+/-	20	-9	+/-	5
	25	-30	+/-	21	-3	+/-	4
	26	-24	+/-	21	6	+/-	5
	27	-22	+/-	21	2	+/-	4
	28	-19	+/-	22	3	+/-	4
	29	-23	+/-	22	-4	+/-	4
	30	-22	+/-	22	1	+/-	4
	31	-29	+/-	23	-7	+/-	5
	32	6	+/-	23	35	+/-	7
	33	14	+/-	23	8	+/-	5
	34	12	+/-	24	-2	+/-	4
	35	17	+/-	24	5	+/-	5
	36	28	+/-	25	11	+/-	5
	37	22	+/-	25	-6	+/-	5
	38	20	+/-	25	-2	+/-	4
	39	10	+/-	25	-10	+/-	5
	40	4	+/-	25	-6	+/-	5
	41	-4	+/-	26	-8	+/-	5
	42	-5	+/-	26	-1	+/-	4
	43	-9	+/-	26	-4	+/-	4
	44	-1	+/-	27	8	+/-	5
	45	-4	+/-	27	-3	+/-	4
	46	0	+/-	27	4	+/-	4
	47	5	+/-	28	5	+/-	5
	48	8	+/-	28	3	+/-	4
	49	-2	+/-	28	-10	+/-	5
	50	1	+/-	28	3	+/-	4
	51	1	+/-	29	0	+/-	4
	52	0	+/-	29	-1	+/-	4
	53	7	+/-	29	7	+/-	5
	54	14	+/-	30	7	+/-	5
	55	-1	+/-	30	-15	+/-	6
	56	-11	+/-	30	-10	+/-	5
	57	-14	+/-	30	-3	+/-	4
	58	-11	+/-	31	3	+/-	4
	59	-5	+/-	31	6	+/-	5
	60	-7	+/-	31	-2	+/-	4
	Terminal	Count	=	-7	+/-	31

## Sheet: 30cm
=========================================================================================
Run	Name:	Powick	Hams	Sample	no:	101
Sequence	Name:	Soton	Test	Filename:	Soton	Test
Dark	Count:	16	c/s	Light	Count:	0	c/s
Dark	Count	Correction:	OFF	256	Offset	Subtract:	ON
Datafile	Path:	C:\Results\Soton	Test\Powick	Hams\Powick	Hams\Powick	Hams0101.psl
Summary	Path	:	C:\Results\Soton	Test\Powick	Hams\Powick	Hams\summary\Powick	Hams.sum
Run	Sequence	:	Soton	Test
-----------------------------------------------------------------------------------------
\	30cm	@	2019-03-07	15:46:28	/
	'--------------------------'
----------------------------------------------------------------------------------------
Measurement	:	DARK	60s	|	Stim	0	|	On/Off(us)	15,15	|	Cycle(ms),No	1000,	60
----------------------------------------------------------------------------------------
Time	(s)	Total	Count	Counts	per	Cycle
--------	---------------------	---------------------
	1	-2	+/-	4	-2	+/-	4
	2	26	+/-	8	28	+/-	7
	3	27	+/-	9	1	+/-	4
	4	27	+/-	10	0	+/-	4
	5	53	+/-	12	26	+/-	6
	6	55	+/-	12	2	+/-	4
	7	53	+/-	13	-2	+/-	4
	8	49	+/-	13	-4	+/-	4
	9	44	+/-	14	-5	+/-	5
	10	36	+/-	14	-8	+/-	5
	11	36	+/-	15	0	+/-	4
	12	35	+/-	15	-1	+/-	4
	13	42	+/-	16	7	+/-	5
	14	42	+/-	16	0	+/-	4
	15	29	+/-	16	-13	+/-	5
	16	34	+/-	17	5	+/-	5
	17	33	+/-	17	-1	+/-	4
	18	32	+/-	18	-1	+/-	4
	19	28	+/-	18	-4	+/-	4
	20	24	+/-	19	-4	+/-	4
	21	39	+/-	19	15	+/-	6
	22	41	+/-	20	2	+/-	4
	23	49	+/-	20	8	+/-	5
	24	46	+/-	21	-3	+/-	4
	25	46	+/-	21	0	+/-	4
	26	42	+/-	21	-4	+/-	4
	27	39	+/-	22	-3	+/-	4
	28	32	+/-	22	-7	+/-	5
	29	30	+/-	22	-2	+/-	4
	30	27	+/-	23	-3	+/-	4
	31	29	+/-	23	2	+/-	4
	32	29	+/-	23	0	+/-	4
	33	28	+/-	24	-1	+/-	4
	34	28	+/-	24	0	+/-	4
	35	25	+/-	24	-3	+/-	4
	36	19	+/-	24	-6	+/-	5
	37	21	+/-	25	2	+/-	4
	38	23	+/-	25	2	+/-	4
	39	25	+/-	25	2	+/-	4
	40	12	+/-	26	-13	+/-	5
	41	13	+/-	26	1	+/-	4
	42	13	+/-	26	0	+/-	4
	43	17	+/-	27	4	+/-	4
	44	9	+/-	27	-8	+/-	5
	45	9	+/-	27	0	+/-	4
	46	7	+/-	27	-2	+/-	4
	47	8	+/-	28	1	+/-	4
	48	8	+/-	28	0	+/-	4
	49	4	+/-	28	-4	+/-	4
	50	9	+/-	28	5	+/-	5
	51	3	+/-	29	-6	+/-	5
	52	-4	+/-	29	-7	+/-	5
	53	-9	+/-	29	-5	+/-	5
	54	8	+/-	30	17	+/-	6
	55	3	+/-	30	-5	+/-	5
	56	-2	+/-	30	-5	+/-	5
	57	11	+/-	30	13	+/-	5
	58	5	+/-	31	-6	+/-	5
	59	10	+/-	31	5	+/-	5
	60	4	+/-	31	-6	+/-	5
	Terminal	Count	=	4	+/-	31
----------------------------------------------------------------------------------------
Measurement	:	S1	15	15	60s	|	Stim	1	|	On/Off(us)	15,15	|	Cycle(ms),No	1000,	60
----------------------------------------------------------------------------------------
Time	(s)	Total	Count	Counts	per	Cycle
--------	---------------------	---------------------
	1	558	+/-	24	558	+/-	24
	2	1102	+/-	34	544	+/-	24
	3	1695	+/-	42	593	+/-	25
	4	2292	+/-	49	597	+/-	25
	5	2848	+/-	54	556	+/-	24
	6	3423	+/-	59	575	+/-	24
	7	3899	+/-	63	476	+/-	22
	8	4375	+/-	67	476	+/-	22
	9	4893	+/-	71	518	+/-	23
	10	5381	+/-	74	488	+/-	22
	11	5836	+/-	78	455	+/-	22
	12	6357	+/-	81	521	+/-	23
	13	6864	+/-	84	507	+/-	23
	14	7378	+/-	87	514	+/-	23
	15	7857	+/-	90	479	+/-	22
	16	8349	+/-	93	492	+/-	23
	17	8898	+/-	96	549	+/-	24
	18	9395	+/-	98	497	+/-	23
	19	9914	+/-	101	519	+/-	23
	20	10315	+/-	103	401	+/-	20
	21	10789	+/-	105	474	+/-	22
	22	11283	+/-	108	494	+/-	23
	23	11764	+/-	110	481	+/-	22
	24	12236	+/-	112	472	+/-	22
	25	12684	+/-	114	448	+/-	22
	26	13125	+/-	116	441	+/-	21
	27	13619	+/-	119	494	+/-	23
	28	14073	+/-	121	454	+/-	22
	29	14494	+/-	122	421	+/-	21
	30	14867	+/-	124	373	+/-	20
	31	15303	+/-	126	436	+/-	21
	32	15718	+/-	127	415	+/-	21
	33	16105	+/-	129	387	+/-	20
	34	16488	+/-	131	383	+/-	20
	35	16910	+/-	132	422	+/-	21
	36	17297	+/-	134	387	+/-	20
	37	17680	+/-	135	383	+/-	20
	38	18104	+/-	137	424	+/-	21
	39	18530	+/-	138	426	+/-	21
	40	18856	+/-	140	326	+/-	18
	41	19288	+/-	141	432	+/-	21
	42	19637	+/-	143	349	+/-	19
	43	20017	+/-	144	380	+/-	20
	44	20362	+/-	145	345	+/-	19
	45	20742	+/-	146	380	+/-	20
	46	21064	+/-	148	322	+/-	18
	47	21447	+/-	149	383	+/-	20
	48	21785	+/-	150	338	+/-	19
	49	22152	+/-	151	367	+/-	20
	50	22514	+/-	153	362	+/-	19
	51	22888	+/-	154	374	+/-	20
	52	23284	+/-	155	396	+/-	20
	53	23664	+/-	157	380	+/-	20
	54	24051	+/-	158	387	+/-	20
	55	24461	+/-	159	410	+/-	21
	56	24810	+/-	160	349	+/-	19
	57	25185	+/-	162	375	+/-	20
	58	25543	+/-	163	358	+/-	19
	59	25937	+/-	164	394	+/-	20
	60	26245	+/-	165	308	+/-	18
		S1	AVR Counts per Cycle		437.417	+/-	21.2333
	Terminal	Count	=	26245	+/-	165
----------------------------------------------------------------------------------------
Measurement	:	S2	15	15	60s	|	Stim	2	|	On/Off(us)	15,15	|	Cycle(ms),No	1000,	60
----------------------------------------------------------------------------------------
Time	(s)	Total	Count	Counts	per	Cycle
--------	---------------------	---------------------
	1	1077	+/-	33	1077	+/-	33
	2	2363	+/-	49	1286	+/-	36
	3	3631	+/-	61	1268	+/-	36
	4	4703	+/-	69	1072	+/-	33
	5	5954	+/-	78	1251	+/-	36
	6	7172	+/-	85	1218	+/-	35
	7	8412	+/-	92	1240	+/-	35
	8	9581	+/-	99	1169	+/-	34
	9	10705	+/-	104	1124	+/-	34
	10	11688	+/-	109	983	+/-	32
	11	12752	+/-	114	1064	+/-	33
	12	13782	+/-	118	1030	+/-	32
	13	14913	+/-	123	1131	+/-	34
	14	16079	+/-	128	1166	+/-	34
	15	17106	+/-	132	1027	+/-	32
	16	18083	+/-	135	977	+/-	32
	17	19131	+/-	139	1048	+/-	33
	18	20274	+/-	143	1143	+/-	34
	19	21308	+/-	147	1034	+/-	32
	20	22293	+/-	150	985	+/-	32
	21	23313	+/-	154	1020	+/-	32
	22	24359	+/-	157	1046	+/-	33
	23	25335	+/-	160	976	+/-	31
	24	26376	+/-	164	1041	+/-	33
	25	27361	+/-	167	985	+/-	32
	26	28407	+/-	170	1046	+/-	33
	27	29448	+/-	173	1041	+/-	33
	28	30363	+/-	176	915	+/-	31
	29	31366	+/-	178	1003	+/-	32
	30	32471	+/-	182	1105	+/-	33
	31	33465	+/-	184	994	+/-	32
	32	34293	+/-	187	828	+/-	29
	33	35300	+/-	189	1007	+/-	32
	34	36297	+/-	192	997	+/-	32
	35	37310	+/-	195	1013	+/-	32
	36	38263	+/-	197	953	+/-	31
	37	39212	+/-	200	949	+/-	31
	38	40237	+/-	202	1025	+/-	32
	39	41242	+/-	205	1005	+/-	32
	40	42306	+/-	207	1064	+/-	33
	41	43208	+/-	209	902	+/-	30
	42	44159	+/-	212	951	+/-	31
	43	45087	+/-	214	928	+/-	31
	44	46006	+/-	216	919	+/-	31
	45	46889	+/-	218	883	+/-	30
	46	47832	+/-	220	943	+/-	31
	47	48731	+/-	222	899	+/-	30
	48	49661	+/-	225	930	+/-	31
	49	50465	+/-	226	804	+/-	29
	50	51337	+/-	228	872	+/-	30
	51	52206	+/-	230	869	+/-	30
	52	52995	+/-	232	789	+/-	28
	53	53937	+/-	234	942	+/-	31
	54	54816	+/-	236	879	+/-	30
	55	55643	+/-	238	827	+/-	29
	56	56481	+/-	240	838	+/-	29
	57	57322	+/-	241	841	+/-	29
	58	58177	+/-	243	855	+/-	30
	59	59020	+/-	245	843	+/-	29
	60	59888	+/-	247	868	+/-	30
		S2	AVR Counts per Cycle		998.133	+/-	31.8333
	Terminal	Count	=	59888	+/-	247
----------------------------------------------------------------------------------------
Measurement	:	DARK	60s	|	Stim	0	|	On/Off(us)	15,15	|	Cycle(ms),No	1000,	60
----------------------------------------------------------------------------------------
Time	(s)	Total	Count	Counts	per	Cycle
--------	---------------------	---------------------
	1	-5	+/-	5	-5	+/-	5
	2	-7	+/-	6	-2	+/-	4
	3	-10	+/-	8	-3	+/-	4
	4	-2	+/-	8	8	+/-	5
	5	1	+/-	9	3	+/-	4
	6	1	+/-	10	0	+/-	4
	7	3	+/-	11	2	+/-	4
	8	17	+/-	12	14	+/-	5
	9	14	+/-	13	-3	+/-	4
	10	-2	+/-	13	-16	+/-	6
	11	6	+/-	13	8	+/-	5
	12	4	+/-	14	-2	+/-	4
	13	3	+/-	15	-1	+/-	4
	14	12	+/-	15	9	+/-	5
	15	9	+/-	16	-3	+/-	4
	16	6	+/-	16	-3	+/-	4
	17	9	+/-	17	3	+/-	4
	18	5	+/-	17	-4	+/-	4
	19	8	+/-	18	3	+/-	4
	20	3	+/-	18	-5	+/-	5
	21	-2	+/-	18	-5	+/-	5
	22	-10	+/-	19	-8	+/-	5
	23	7	+/-	19	17	+/-	6
	24	3	+/-	20	-4	+/-	4
	25	-4	+/-	20	-7	+/-	5
	26	-12	+/-	21	-8	+/-	5
	27	-19	+/-	21	-7	+/-	5
	28	-25	+/-	22	-6	+/-	5
	29	-26	+/-	22	-1	+/-	4
	30	-29	+/-	23	-3	+/-	4
	31	-25	+/-	23	4	+/-	4
	32	-26	+/-	23	-1	+/-	4
	33	-23	+/-	23	3	+/-	4
	34	-21	+/-	24	2	+/-	4
	35	-13	+/-	24	8	+/-	5
	36	-26	+/-	25	-13	+/-	5
	37	-21	+/-	25	5	+/-	5
	38	-22	+/-	25	-1	+/-	4
	39	-22	+/-	25	0	+/-	4
	40	-21	+/-	26	1	+/-	4
	41	-22	+/-	26	-1	+/-	4
	42	-25	+/-	26	-3	+/-	4
	43	-33	+/-	27	-8	+/-	5
	44	-40	+/-	27	-7	+/-	5
	45	-39	+/-	28	1	+/-	4
	46	-39	+/-	28	0	+/-	4
	47	-41	+/-	28	-2	+/-	4
	48	-40	+/-	28	1	+/-	4
	49	-37	+/-	29	3	+/-	4
	50	-59	+/-	29	-22	+/-	6
	51	-61	+/-	30	-2	+/-	4
	52	-78	+/-	30	-17	+/-	6
	53	-78	+/-	30	0	+/-	4
	54	-99	+/-	31	-21	+/-	6
	55	-103	+/-	31	-4	+/-	4
	56	-91	+/-	31	12	+/-	5
	57	-91	+/-	32	0	+/-	4
	58	-87	+/-	32	4	+/-	4
	59	-88	+/-	32	-1	+/-	4
	60	-92	+/-	32	-4	+/-	4
	Terminal	Count	=	-92	+/-	32

## Sheet: 35cm
=========================================================================================
Run	Name:	Powick	Hams	Sample	no:	100
Sequence	Name:	Soton	Test	Filename:	Soton	Test
Dark	Count:	16	c/s	Light	Count:	0	c/s
Dark	Count	Correction:	OFF	256	Offset	Subtract:	ON
Datafile	Path:	C:\Results\Soton	Test\Powick	Hams\Powick	Hams\Powick	Hams0100.psl
Summary	Path	:	C:\Results\Soton	Test\Powick	Hams\Powick	Hams\summary\Powick	Hams.sum
Run	Sequence	:	Soton	Test
-----------------------------------------------------------------------------------------
\	35cm	@	2019-03-07	15:41:42	/
	'--------------------------'
----------------------------------------------------------------------------------------
Measurement	:	DARK	60s	|	Stim	0	|	On/Off(us)	15,15	|	Cycle(ms),No	1000,	60
----------------------------------------------------------------------------------------
Time	(s)	Total	Count	Counts	per	Cycle
--------	---------------------	---------------------
	1	2	+/-	4	2	+/-	4
	2	3	+/-	6	1	+/-	4
	3	1	+/-	7	-2	+/-	4
	4	7	+/-	8	6	+/-	5
	5	10	+/-	9	3	+/-	4
	6	18	+/-	11	8	+/-	5
	7	19	+/-	11	1	+/-	4
	8	33	+/-	13	14	+/-	5
	9	34	+/-	13	1	+/-	4
	10	37	+/-	14	3	+/-	4
	11	44	+/-	15	7	+/-	5
	12	35	+/-	15	-9	+/-	5
	13	34	+/-	16	-1	+/-	4
	14	54	+/-	17	20	+/-	6
	15	63	+/-	17	9	+/-	5
	16	57	+/-	18	-6	+/-	5
	17	63	+/-	18	6	+/-	5
	18	71	+/-	19	8	+/-	5
	19	62	+/-	19	-9	+/-	5
	20	51	+/-	19	-11	+/-	5
	21	69	+/-	20	18	+/-	6
	22	66	+/-	20	-3	+/-	4
	23	81	+/-	21	15	+/-	6
	24	74	+/-	21	-7	+/-	5
	25	78	+/-	22	4	+/-	4
	26	76	+/-	22	-2	+/-	4
	27	64	+/-	22	-12	+/-	5
	28	52	+/-	22	-12	+/-	5
	29	53	+/-	23	1	+/-	4
	30	53	+/-	23	0	+/-	4
	31	53	+/-	23	0	+/-	4
	32	44	+/-	24	-9	+/-	5
	33	49	+/-	24	5	+/-	5
	34	49	+/-	24	0	+/-	4
	35	49	+/-	25	0	+/-	4
	36	45	+/-	25	-4	+/-	4
	37	44	+/-	25	-1	+/-	4
	38	48	+/-	26	4	+/-	4
	39	46	+/-	26	-2	+/-	4
	40	49	+/-	26	3	+/-	4
	41	41	+/-	26	-8	+/-	5
	42	41	+/-	27	0	+/-	4
	43	47	+/-	27	6	+/-	5
	44	48	+/-	27	1	+/-	4
	45	48	+/-	28	0	+/-	4
	46	54	+/-	28	6	+/-	5
	47	67	+/-	29	13	+/-	5
	48	84	+/-	29	17	+/-	6
	49	85	+/-	29	1	+/-	4
	50	90	+/-	30	5	+/-	5
	51	90	+/-	30	0	+/-	4
	52	87	+/-	30	-3	+/-	4
	53	87	+/-	31	0	+/-	4
	54	82	+/-	31	-5	+/-	5
	55	83	+/-	31	1	+/-	4
	56	79	+/-	31	-4	+/-	4
	57	91	+/-	32	12	+/-	5
	58	80	+/-	32	-11	+/-	5
	59	86	+/-	32	6	+/-	5
	60	87	+/-	32	1	+/-	4
	Terminal	Count	=	87	+/-	32
----------------------------------------------------------------------------------------
Measurement	:	S1	15	15	60s	|	Stim	1	|	On/Off(us)	15,15	|	Cycle(ms),No	1000,	60
----------------------------------------------------------------------------------------
Time	(s)	Total	Count	Counts	per	Cycle
--------	---------------------	---------------------
	1	432	+/-	21	432	+/-	21
	2	874	+/-	30	442	+/-	21
	3	1259	+/-	36	385	+/-	20
	4	1625	+/-	41	366	+/-	20
	5	1981	+/-	45	356	+/-	19
	6	2342	+/-	49	361	+/-	19
	7	2732	+/-	53	390	+/-	20
	8	3079	+/-	57	347	+/-	19
	9	3496	+/-	60	417	+/-	21
	10	3820	+/-	63	324	+/-	18
	11	4190	+/-	66	370	+/-	20
	12	4499	+/-	68	309	+/-	18
	13	4870	+/-	71	371	+/-	20
	14	5151	+/-	73	281	+/-	17
	15	5457	+/-	75	306	+/-	18
	16	5667	+/-	77	210	+/-	15
	17	6017	+/-	79	350	+/-	19
	18	6323	+/-	81	306	+/-	18
	19	6709	+/-	84	386	+/-	20
	20	7015	+/-	86	306	+/-	18
	21	7349	+/-	88	334	+/-	19
	22	7646	+/-	89	297	+/-	18
	23	7937	+/-	91	291	+/-	18
	24	8261	+/-	93	324	+/-	18
	25	8550	+/-	95	289	+/-	17
	26	8882	+/-	96	332	+/-	19
	27	9227	+/-	98	345	+/-	19
	28	9529	+/-	100	302	+/-	18
	29	9861	+/-	102	332	+/-	19
	30	10169	+/-	103	308	+/-	18
	31	10448	+/-	105	279	+/-	17
	32	10731	+/-	106	283	+/-	17
	33	11058	+/-	108	327	+/-	19
	34	11341	+/-	109	283	+/-	17
	35	11704	+/-	111	363	+/-	19
	36	11983	+/-	112	279	+/-	17
	37	12267	+/-	113	284	+/-	17
	38	12569	+/-	115	302	+/-	18
	39	12852	+/-	116	283	+/-	17
	40	13162	+/-	117	310	+/-	18
	41	13462	+/-	119	300	+/-	18
	42	13757	+/-	120	295	+/-	18
	43	14058	+/-	121	301	+/-	18
	44	14331	+/-	123	273	+/-	17
	45	14659	+/-	124	328	+/-	19
	46	14982	+/-	125	323	+/-	18
	47	15284	+/-	127	302	+/-	18
	48	15566	+/-	128	282	+/-	17
	49	15799	+/-	129	233	+/-	16
	50	16130	+/-	130	331	+/-	19
	51	16394	+/-	131	264	+/-	17
	52	16698	+/-	132	304	+/-	18
	53	16989	+/-	134	291	+/-	18
	54	17280	+/-	135	291	+/-	18
	55	17587	+/-	136	307	+/-	18
	56	17790	+/-	137	203	+/-	15
	57	18090	+/-	138	300	+/-	18
	58	18368	+/-	139	278	+/-	17
	59	18647	+/-	140	279	+/-	17
	60	18867	+/-	141	220	+/-	15
		S1	AVR Counts per Cycle		314.45	+/-	18.15
	Terminal	Count	=	18867	+/-	141
----------------------------------------------------------------------------------------
Measurement	:	S2	15	15	60s	|	Stim	2	|	On/Off(us)	15,15	|	Cycle(ms),No	1000,	60
----------------------------------------------------------------------------------------
Time	(s)	Total	Count	Counts	per	Cycle
--------	---------------------	---------------------
	1	795	+/-	28	795	+/-	28
	2	1792	+/-	43	997	+/-	32
	3	2694	+/-	52	902	+/-	30
	4	3679	+/-	61	985	+/-	32
	5	4670	+/-	69	991	+/-	32
	6	5590	+/-	75	920	+/-	31
	7	6410	+/-	81	820	+/-	29
	8	7328	+/-	86	918	+/-	31
	9	8261	+/-	92	933	+/-	31
	10	9127	+/-	96	866	+/-	30
	11	10069	+/-	101	942	+/-	31
	12	10849	+/-	105	780	+/-	28
	13	11614	+/-	109	765	+/-	28
	14	12477	+/-	113	863	+/-	30
	15	13293	+/-	116	816	+/-	29
	16	14143	+/-	120	850	+/-	29
	17	14686	+/-	122	543	+/-	24
	18	15601	+/-	126	915	+/-	31
	19	16390	+/-	129	789	+/-	28
	20	17225	+/-	132	835	+/-	29
	21	18072	+/-	136	847	+/-	29
	22	18887	+/-	139	815	+/-	29
	23	19689	+/-	142	802	+/-	29
	24	20487	+/-	144	798	+/-	29
	25	21326	+/-	147	839	+/-	29
	26	22151	+/-	150	825	+/-	29
	27	22900	+/-	153	749	+/-	28
	28	23748	+/-	156	848	+/-	29
	29	24550	+/-	158	802	+/-	29
	30	25324	+/-	161	774	+/-	28
	31	26119	+/-	163	795	+/-	28
	32	26869	+/-	165	750	+/-	28
	33	27583	+/-	168	714	+/-	27
	34	28312	+/-	170	729	+/-	27
	35	29070	+/-	172	758	+/-	28
	36	29769	+/-	174	699	+/-	27
	37	30531	+/-	176	762	+/-	28
	38	31327	+/-	179	796	+/-	28
	39	32116	+/-	181	789	+/-	28
	40	32867	+/-	183	751	+/-	28
	41	33576	+/-	185	709	+/-	27
	42	34386	+/-	187	810	+/-	29
	43	35073	+/-	189	687	+/-	27
	44	35836	+/-	191	763	+/-	28
	45	36604	+/-	193	768	+/-	28
	46	37333	+/-	195	729	+/-	27
	47	38018	+/-	197	685	+/-	26
	48	38773	+/-	199	755	+/-	28
	49	39576	+/-	201	803	+/-	29
	50	40319	+/-	203	743	+/-	28
	51	40965	+/-	204	646	+/-	26
	52	41581	+/-	206	616	+/-	25
	53	42371	+/-	208	790	+/-	28
	54	43130	+/-	210	759	+/-	28
	55	43878	+/-	212	748	+/-	28
	56	44554	+/-	213	676	+/-	26
	57	45336	+/-	215	782	+/-	28
	58	46085	+/-	217	749	+/-	28
	59	46749	+/-	218	664	+/-	26
	60	47526	+/-	220	777	+/-	28
		S2	AVR Counts per Cycle		792.1	+/-	28.4333
	Terminal	Count	=	47526	+/-	220
----------------------------------------------------------------------------------------
Measurement	:	DARK	60s	|	Stim	0	|	On/Off(us)	15,15	|	Cycle(ms),No	1000,	60
----------------------------------------------------------------------------------------
Time	(s)	Total	Count	Counts	per	Cycle
--------	---------------------	---------------------
	1	6	+/-	5	6	+/-	5
	2	-7	+/-	6	-13	+/-	5
	3	-6	+/-	7	1	+/-	4
	4	-8	+/-	8	-2	+/-	4
	5	-13	+/-	10	-5	+/-	5
	6	-12	+/-	10	1	+/-	4
	7	-19	+/-	11	-7	+/-	5
	8	-10	+/-	12	9	+/-	5
	9	-7	+/-	12	3	+/-	4
	10	-10	+/-	13	-3	+/-	4
	11	8	+/-	14	18	+/-	6
	12	8	+/-	14	0	+/-	4
	13	3	+/-	15	-5	+/-	5
	14	9	+/-	15	6	+/-	5
	15	18	+/-	16	9	+/-	5
	16	21	+/-	17	3	+/-	4
	17	27	+/-	17	6	+/-	5
	18	21	+/-	18	-6	+/-	5
	19	32	+/-	18	11	+/-	5
	20	30	+/-	19	-2	+/-	4
	21	27	+/-	19	-3	+/-	4
	22	29	+/-	20	2	+/-	4
	23	23	+/-	20	-6	+/-	5
	24	22	+/-	20	-1	+/-	4
	25	18	+/-	20	-4	+/-	4
	26	20	+/-	21	2	+/-	4
	27	17	+/-	21	-3	+/-	4
	28	23	+/-	22	6	+/-	5
	29	21	+/-	22	-2	+/-	4
	30	24	+/-	22	3	+/-	4
	31	17	+/-	23	-7	+/-	5
	32	16	+/-	23	-1	+/-	4
	33	25	+/-	24	9	+/-	5
	34	21	+/-	24	-4	+/-	4
	35	25	+/-	24	4	+/-	4
	36	25	+/-	25	0	+/-	4
	37	23	+/-	25	-2	+/-	4
	38	15	+/-	25	-8	+/-	5
	39	19	+/-	25	4	+/-	4
	40	20	+/-	26	1	+/-	4
	41	16	+/-	26	-4	+/-	4
	42	37	+/-	27	21	+/-	6
	43	34	+/-	27	-3	+/-	4
	44	31	+/-	27	-3	+/-	4
	45	38	+/-	28	7	+/-	5
	46	43	+/-	28	5	+/-	5
	47	44	+/-	28	1	+/-	4
	48	39	+/-	28	-5	+/-	5
	49	44	+/-	29	5	+/-	5
	50	42	+/-	29	-2	+/-	4
	51	37	+/-	29	-5	+/-	5
	52	32	+/-	29	-5	+/-	5
	53	33	+/-	30	1	+/-	4
	54	28	+/-	30	-5	+/-	5
	55	24	+/-	30	-4	+/-	4
	56	33	+/-	30	9	+/-	5
	57	33	+/-	31	0	+/-	4
	58	45	+/-	31	12	+/-	5
	59	38	+/-	31	-7	+/-	5
	60	43	+/-	32	5	+/-	5
	Terminal	Count	=	43	+/-	32

[truncated: 99 more sheets: 40cm, 45cm, 50cm, 55cm, 60cm, 65cm, 70cm, 75cm, 80cm, 85cm, 90cm, 95cm, 100cm, 105cm, 110cm, 115cm, 120cm, 125cm, 130cm, 135cm …]
